# Supplementary material for: Experimental identification and characterization of 97 novel npcRNA candidates in Salmonella enterica serovar Typhi
Source: PubMed Central journal article supplement — Nucleic Acids Res. 2010 May 11;38(17):5893–908. doi: 10.1093/nar/gkq281 (PMC2943607; doi:10.1093/nar/gkq281), 2010-05-11
Supplement: supp_gkq281_Sty_Supplementary.pdf [file supp_gkq281_Sty_Supplementary.pdf]

## Supplementary Material and Methods

### Real-time PCR analyses

*S. typhi* total RNA (500 ng input), isolated from different bacterial growth stages, was DNase-treated (Roche) and reverse transcribed using Transcriptor Reverse Transcriptase (Roche) and a gene-specific primer (MWG) at 55°C for 1 hr (Supplementary Table S1). Real-time PCR with 1:100 diluted cDNAs was performed using the LightCycler 480 (Roche) and SYBR Green I Master (Roche) in a 12.5- $\mu$ l reaction volume (at least in triplicates) under the following cycling conditions: 95°C, 5 min, followed by 45 cycles of 95°C for 20 s; 53°C for 40 s; and 68°C for 50 s. For relative quantification, 16S rRNA was used as reference control. The integrities of the PCR products were verified by gel electrophoresis on either 8% polyacrylamide (in 1x TBE buffer) or 2% agarose (in 1x TAE buffer) gels. In addition, a melting curve analysis was carried out for each reaction. The calculations of average Cp values, SDs, and resulting expression ratios for each candidate were performed using the Roche LightCycler 480 software.

## Supplementary Results and Discussion

### Interaction of *S. Typhi* Hfq protein with novel npcRNA candidates

Hfq protein is conserved in a wide variety of bacteria and is involved in many cellular functions, such as the stress response and regulation of gene expression. In Gram-negative bacteria this protein acts in pleotropic regulations, such as outer membrane protein biogenesis and the activation of *rpoS* during conditions of oxidative stress (1). Hfq is essential for the mobility of synechocystis species and for the virulence and pathogenicity of *Pseudomonas aeruginosa*, *Brucella abortus*, *Vibrio cholerae*, *Listeria monocytogens*, *Legionella pneumophila* and uropathogenic *E. coli* (2-8) and is required in *S. typhimurium* for invasion of and growth in epithelial cells and macrophages (9). Hfq is also essential for the translational repression or activation exerted many *trans*-acting npcRNAs. Therefore we randomly chose 2 to 4 candidates from each class of npcRNAs and tested their interaction with *S. typhi* Hfq protein, which we expressed in *E. coli* and purified by affinity chromatography (see Material and Methods)

We used *in vitro* binding assays to analyze whether selected npcRNA candidates were able to specifically interact and form stable RNP complexes with the *S. typhi* Hfq protein. The *in vitro* synthesized npcRNAs were radioactively labeled and incubated with increasing concentrations of recombinant *S. typhi* Hfq protein (from 25 nM to 400 nM). Complexes were formed in the presence of a vast excess of non-specific competitor (total yeast RNA in a molar ratio of 1:4100) and assayed on native gels (see Material and Methods) Out of 11 npcRNAs candidates examined (from the partially overlapping with ORF, antisense, and intergenic classes), six formed specific and stable complexes with recombinant Hfq protein with apparent K50s ranging from 25 to 200 nM (Supplementary Figure S4).

The StyR-296 npcRNA candidate is 293 nt long with a 71-nt overlap to the 5'- ORF region of the *rpoH* gene, which encodes the stress response transcription factor, sigma-32. The 5'-UTR region of *rpoH* mRNA regulates its translation in a temperature-dependent manner (10). Thus, the finding of a stable npcRNA transcript within this region might indicate that regulation of *rpoH* expression may be even more intricate than proposed, involving an additional specific StyR-296-Hfq RNP complex (Figure 6, Supplementary Figure S4). Moreover, during *in vitro* translation assays, increasing concentrations of recombinant Hfq protein positively regulated translation of an *rpoH* mRNA harboring the npcRNA in the 5'-UTR (data not shown). Furthermore, StyR-9 overlapped in the sense orientation with the ORF region of the *t4341* gene and also showed specific interaction with Hfq protein, binding with an apparent K50 of 100 nM (Figure 6, Supplementary Figure S4). These observations indicate that candidates from this class of stable small npcRNA molecules might recruit the Hfq protein into RNP complexes to exert their function.

The intergenically located StyR-10 and StyR-241 also formed specific npcRNP complexes with the Hfq protein with apparent K50s of 50 and 200 nM, respectively (Figure 2, Supplementary Figure S1, S4). Both putative npcRNAs belong to the subgroup of promoter-associated RNAs. Interesting, StyR-241 overlaps in an antisense orientation to a binding site for the Ntrc transcription factor (Supplementary Figure S1). Recently, it was suggested that promoter activity could be regulated by npcRNAs (11-14); hence, Hfq

protein might play a role as an RNA chaperone to stabilize npcRNAs during their functions.

Two repetitive npcRNA candidates (StyR-103 and StyR-215) did not interact with Hfq protein (Figure 5A, B, Supplementary Figure S4). StyR-103 was proposed to regulate *IS200* transposase gene expression in *cis*, whereby the Hfq RNP complex might not be required. StyR-215, derived from the externally transcribed spacer (*ETS*) of *S. typhi* pre-16S rRNA, might potentially be associated with rRNA biogenesis, whereby Hfq protein is likely not essential.

Although Hfq protein was shown to be required mainly for the function of *trans*-encoded regulatory small npcRNAs, we detected specific complex formations between Hfq and two *cis*-encoded antisense npcRNA candidates (StyR-151 and StyR-248) (Figure 4, Supplementary Figure S2). Sty-151 and StyR-248 Hfq complexes were both formed with apparent K50s of 75 nM (Supplementary Figure S4). These data suggest the possible existence of additional aspects of sense-antisense regulation as well as implicate the npcRNA candidates in other functions.

## References

1. Nakano, M., Takahashi, A., Su, Z., Harada, N., Mawatari, K. and Nakaya, Y. (2008) Hfq regulates the expression of the thermostable direct hemolysin gene in *Vibrio parahaemolyticus*. *BMC Microbiol*, **8**, 155.
2. Dienst, D., Duhring, U., Mollenkopf, H.J., Vogel, J., Golecki, J., Hess, W.R. and Wilde, A. (2008) The cyanobacterial homologue of the RNA chaperone Hfq is essential for motility of *Synechocystis* sp. PCC 6803. *Microbiology*, **154**, 3134-3143.
3. Sonnleitner, E., Hagens, S., Rosenau, F., Wilhelm, S., Habel, A., Jager, K.E. and Blasi, U. (2003) Reduced virulence of a hfq mutant of *Pseudomonas aeruginosa* O1. *Microb Pathog*, **35**, 217-228.
4. Roop, R.M., 2nd, Gee, J.M., Robertson, G.T., Richardson, J.M., Ng, W.L. and Winkler, M.E. (2003) *Brucella* stationary-phase gene expression and virulence. *Annu Rev Microbiol*, **57**, 57-76.
5. Ding, Y., Davis, B.M. and Waldor, M.K. (2004) Hfq is essential for *Vibrio cholerae* virulence and downregulates sigma expression. *Mol Microbiol*, **53**, 345-354.
6. Christiansen, J.K., Larsen, M.H., Ingmer, H., Sogaard-Andersen, L. and Kallipolitis, B.H. (2004) The RNA-binding protein Hfq of *Listeria monocytogenes*: role in stress tolerance and virulence. *J Bacteriol*, **186**, 3355-3362.
7. McNealy, T.L., Forsbach-Birk, V., Shi, C. and Marre, R. (2005) The Hfq homolog in *Legionella pneumophila* demonstrates regulation by LetA and RpoS and interacts with the global regulator CsrA. *J Bacteriol*, **187**, 1527-1532.
8. Kulesus, R.R., Diaz-Perez, K., Slechta, E.S., Eto, D.S. and Mulvey, M.A. (2008) Impact of the RNA chaperone Hfq on the fitness and virulence potential of uropathogenic *Escherichia coli*. *Infect Immun*, **76**, 3019-3026.

9. Sittka, A., Pfeiffer, V., Tedin, K. and Vogel, J. (2007) The RNA chaperone Hfq is essential for the virulence of *Salmonella typhimurium*. *Mol Microbiol*, **63**, 193-217.
10. Updegrave, T., Wilf, N., Sun, X. and Wartell, R.M. (2008) Effect of Hfq on RprA-rpoS mRNA pairing: Hfq-RNA binding and the influence of the 5' rpoS mRNA leader region. *Biochemistry*, **47**, 11184-11195.
11. Hirota, K., Miyoshi, T., Kugou, K., Hoffman, C.S., Shibata, T. and Ohta, K. (2008) Stepwise chromatin remodelling by a cascade of transcription initiation of non-coding RNAs. *Nature*, **456**, 130-134.
12. Kapranov, P., Cheng, J., Dike, S., Nix, D.A., Duttagupta, R., Willingham, A.T., Stadler, P.F., Hertel, J., Hackermuller, J., Hofacker, I.L. *et al.* (2007) RNA maps reveal new RNA classes and a possible function for pervasive transcription. *Science*, **316**, 1484-1488.
13. Martens, J.A., Laprade, L. and Winston, F. (2004) Intergenic transcription is required to repress the *Saccharomyces cerevisiae* SER3 gene. *Nature*, **429**, 571-574.
14. Taft, R.J., Glazov, E.A., Cloonan, N., Simons, C., Stephen, S., Faulkner, G.J., Lassmann, T., Forrest, A.R., Grimmond, S.M., Schroder, K. *et al.* (2009) Tiny RNAs associated with transcription start sites in animals. *Nat Genet*, **41**, 572-578.

## Supplementary Figure legends

**Supplementary Figure S1. Schematic representations of novel npcRNA candidates from intergenic regions of *S. typhi*.** Coordinates of depicted genes are based on the completed genome of *S. typhi* Ty2 (AE014613). Locations of npcRNA candidates are depicted by red arrows. Light blue arrows represent ORFs (without UTRs) of flanking genes; protein products are indicated below. Black arrows indicate location and direction of predicted promoters. Drawings are not to scale. **(A)** Promoter-associated npcRNAs. Transcription factors that harbor binding sites within npcRNA coding regions are indicated by colored ovals. **(B)** Terminator-associated npcRNAs **(C)** Operon-associated npcRNAs **(D)** Putative independently transcribed npcRNA genes.

**Supplementary Figure S2. Schematic representations of antisense *S. typhi* npcRNA candidates.** Coordinates of depicted genes are based on the completed genome of *S. typhi* Ty2 (AE014613). Locations of npcRNA candidates are indicated by red arrows. Sense-encoded ORFs of protein-coding genes are indicated by light blue arrows. Drawings are not to scale. **(A)** npcRNA candidates antisense to the 5'-ends of ORFs. **(B)** npcRNA candidates antisense to the 3'-ends of ORFs. **(C)** npcRNA candidates antisense to both the 5'- and 3'-ends or to entire ORFs of protein-coding genes. Green arrow indicates *S. typhi* hypothetical protein-coding gene (annotated in this study). **(D)** *cis*-encoded antisense npcRNA candidate genes to ORFs of protein-coding genes.

**Supplementary Figure S3. Expression analyses of antisense npcRNA candidates and *cis*-encoded mRNA pairs throughout the growth stages of *S. typhi*.** Differential expression profiles of *cis*-encoded antisense npcRNA candidates and sense *S. typhi* protein-coding genes at bacterial growth stages as determined by real-time PCR. 16S rRNA was used for relative quantification. Expression ratios and growth stages are indicated on the Y- and X-axes, respectively. Expression profiles of antisense npcRNA and sense mRNA genes are indicated by red and black lines, respectively

**Supplementary Figure S4. Interaction of Hfq protein with *S. typhi* novel npcRNA candidates** *In vitro* transcribed, <sup>32</sup>P-labeled npcRNA candidates were incubated with increasing concentrations of recombinant *S. typhi* Hfq protein; from left to right 0; 25; 50; 75; 100; 200; 300; and 400 nM of Hfq protein were added, respectively, except for StyR-9 and StyR-280 whereby Hfq protein titration stops at 300 nM. The npcRNA candidates are depicted to the left of the blots and the K50 values to the right.

### Supplementary Table legends

#### Supplementary Table 1: Compilation of oligonucleotides used for this study

ERNS: expressed RNA sequences

#### Supplementary Table 2. Compilation of 217 contigs of cDNA sequences derived from ORFs of the *S. typhi* protein-coding genes.

ERNS: expressed RNA sequences (StyR-); **cDNA (nt)**: length of cDNA (in nt), **cDNA sequence**: sequence of cDNAs contig, **ORF**: open reading frame of a hypothetical protein (HP) or a protein from which the corresponding cDNA is derived, **Comments**: those overlapping with ORFs are indicated.

#### Supplementary Table 3. Known npcRNAs in *E. coli* and/or other *Salmonella* strains.

These RNAs were not previously reported for *S. typhi*. **ERNS**: expressed RNA sequences of npcRNA candidate from *S. typhi*, **cDNA (nt)**: Length of cDNA clones in nt, **Coordinates in *S. Typhi* TY2 genome**: The npcRNA coordinates based on the completed *S. typhi* Ty2 genome annotation (AE014613). **N. blot**: Northern blot expression in *S. typhi*; NP, Northern not performed. **Known npcRNA in other enterobacteria**: Known npcRNA, as reported in a previous study, is indicated and follows the name of the organism in which they were previously identified. **Coordinates in *E. coli***: In the first line, coordinates of StyR- homologous sequences in *E. coli* are indicated, and in the second line, the coordinates for the annotated npcRNA in *E. coli*.

**Table S1. Compilation of oligonucleotides used for this study**

| ERNS        | Oligonucleotides (5'-3')            |
|-------------|-------------------------------------|
| StyR-3      | GGCAACAGCAATAAGCATAGTAATAA          |
| StyR3rev    | TGGGGTGGTCGTCAGCGGCTCCCGCA          |
| StyR-9      | AACATGAGCAAAAAACGAGCCAACATCC        |
| StyR-9new   | CGAGCCAACATCCGCAGATGTTTCGC          |
| StyR-10     | CGGCGCATTGATAATCAGTCCGGCCT          |
| StyR-10new  | TAGGCAAAACGTGCAAAACACTGCGG          |
| StyR-27     | TACTGTGCCGGATGGCGGCTGCGC            |
| StyR-29     | GTGTTCTATATGGACAATTCAAAGG           |
| StyR-29new  | ATAGCTGCGTATACTTTCTTGAT             |
| StyR-44     | TTCGATTCATCATCGTGTTCGC              |
| StyR-51     | ACAGGTTCTGCGTTTAGTTGCCGCGC          |
| StyR-51new  | AAGACAGGTTCTGCGTTTAGTTG             |
| StyR-55     | TTCGACGGAGGCTGGATAGGCCAGG           |
| StyR-88     | CAAGTCTGACATTCCTCCGAGTAAATTGGTC     |
| StyR-88new  | CTCAAACCTGCCCCCTGCCCGGGTT           |
| StyR-90     | CAGGTTGTGCGCACCATCGATTTCCAGC        |
| StyR-99     | CCATTACGTCCTGATGAGGTGCAA            |
| StyR-103    | TACAGGAACAGGGAGTTCTGGTGCA           |
| StyR-103new | TTTACAGGAACAGGGAGTTCTGG             |
| StyR-122    | GACGGCGCGCTGTTGCCACGCTATG           |
| EcoR-122    | GACGGCACGCTACTGCCGCGCTATG           |
| StyR-137    | GTGATGCGCACTGACGGCACGGTGAC          |
| StyR-151    | CACATGCTGATCGAATACCCACC             |
| StyR-161new | CGATTGTCCTTTCGAGTTCACG              |
| StyR-161    | TTCCACGTAACGTCCGTTAAGGTTCT          |
| StyR-169    | ACTCAGAATCCCTTCCGAG                 |
| StyR-173    | AATAGCCAGCAGGCTCAGGATA              |
| StyR-195new | TCGTTACCCCAGTCACATAGTGGCCTA         |
| StyR-195    | TCGTTACCCCAGTCACATAGT               |
| StyR-196    | CTGCGCGCCGCTACTGGAATTA              |
| EcoR-196    | CTGTGCGCCAGCGTACTGGAATTA            |
| StyR-199    | GGATCACCTGCCGGTGGTGCTCGA            |
| StyR-207    | CCCGCAACATTGCGCCTCACC               |
| StyR-207new | TAGCCCCCGTCAGGTTGCCAGG              |
| StyR-215    | GATTGTCTGATAAATTGTTAAAGAGCAG        |
| StyR-219    | CTGGATCAATTTATCGAAGCAAGTT           |
| StyR-219new | AAAGACCTGCGTACTGGGGTGGAAACC         |
| StyR-234    | CTCGTTCCTACTGGCTGTGCCGATGAT         |
| EcoR-234    | CTCGTTCCTGCTGGCGGTGCCGATGAT         |
| StyR-241    | CCTTGTGATCGCTTTCACGGAGC             |
| StyR-243    | TATGAGCAACTGGCAGAGGCCATCCG          |
| EcoR-243    | TATGAGCAGCTGGCAGAGGCCATCCG          |
| StyR-243new | TGTAAGCGCGACGGCGTGGTTTATC           |
| StyR-248    | GCCACCATAACGTTTCGGTTGGGCAA          |
| EcoR-248    | GCCACTTTACGTTTTGGCTGGGCTAA          |
| StyR-248new | CATCTACCCGGCTTAATTACGC              |
| StyR-252    | GGCGCGCCGCTAATCTGGTTTCC             |
| EcoR-252    | GGCGCGCCGTTAATCTGGTTTCC             |
| StyR-254    | TCCTCCCACGCGTTGGCGCACGCTC           |
| EcoR-254    | TCCTCCCACGCCCTGGCCATGCGC            |
| StyR-254new | GTCTCCCACGCGTTGGCGCACGC             |
| StyR-264    | GCATCCCTGCCACTCTCTGCGCACCG          |
| EcoR-264    | CATCCGTCCGCCGTTTCGGCGCATCG          |
| StyR-264new | TGATCCACAGCGCCACCATATT              |
| StyR-280    | CAGGGTCCATGTGCGCTCCGGTAAGT          |
| EcoR-280    | CAGGTTCCATATAACCTCCGGTAAGT          |
| StyR-280new | ACACACCGGTAAGACAGCAGAG              |
| StyR-288    | GAAAACCGCCGATCCTGTCCACC             |
| StyR-296    | GTGATTTTATCCACAAGTTCAATG            |
| StyR-306    | AGACAACGGTTCTCGAGGTTCAAT            |
| EcoR-306    | AGACAACGTTATTCGAGGTTCAAT            |
| StyR-327    | CCGTGTCCAAACTGGCTGCGCCAATTA         |
| StyR-329    | CGGTAAGCGCAGCGCCACCGGGCAA           |
| StyR-329new | TAATGCCGGATGGCGCTAACGC              |
| StyR-333    | ACAAGTCGGCGTCCGATTACATGG            |
| StyR-383    | CATCAGGCGTCTGTTGAGGGTGT             |
| Hfqforvndel | GAGCCATATGGCTAAGGGGCAATCTTTACAAGATC |



---

|            |                                                               |
|------------|---------------------------------------------------------------|
| Hfqrevxhol | GAGCCTCGAGTTATTCAGTCTCTTCGCTGTCCTGT                           |
| RamRndeIF  | GAGCCATATGGCTCGTCCGAAGAGTGAAGAC                               |
| RamRxholR  | GAGCCTCGAGTTATTGCTCTCGCGAGTCAG                                |
| Sty9t7     | GATTAATACGACTCACTATAACCTTTCAACTCTCACCGAGGCTTTG                |
| Sty9rev    | AACATGAGCAAAAACGAGCCAACATCC                                   |
| Sty10t7    | GATTAATACGACTCACTATAGTAAATACCTTTCAACTCAACCCGAGGC              |
| Sty10rev   | TAGGCAAAAACGTGCAAAACACTGCGG                                   |
| Sty55t7    | GATTAATACGACTCACTATAATTGGAGCCTGGCCTATCCAGGCCTCCGTCG           |
| Sty55rev   | GGTCTACGCAGGGGATTAAGCCTCTTGCGAGAC                             |
| StyR103T7  | GATTAATACGACTCACTATACATTTTATCCTCTTCAAGCTGGTGCTTT              |
| StyR103rev | TTTACAGGAACAGGGAGTTCTGGTGCAGAGGGTAC                           |
| Sty151t7   | GATTAATACGACTCACTATAAAAATCAATAAAATTCGTTTCGCAGACGGCG           |
| Sty151rev  | TCATGTCCACATGTGATCGAATACCCACC                                 |
| Sty215t7   | GATTAATACGACTCACTATACTCGCGACGGTGAGCTGAAAGCCGCG                |
| Sty215rev  | TCAGATTGTCTGATAAAATGTAAAGAGCAGG                               |
| Sty234t7   | GATTAATACGACTCACTATAATCATCGGCACAGCCAGTAAGAACGAGAAC            |
| Sty234rev  | TGCTGCGCCTGTGGCCGGGCTTCTCGCG                                  |
| StyR241T7  | GATTAATACGACTCACTATAAGTGCTTCAATGTGAACATTAAGCA                 |
| StyR241rev | TGGTCACAAACATCCTCCGCAAAACAAG                                  |
| StyR248T7  | GATTAATACGACTCACTATAATTCCCCTTCCAGCTTGAATTGCCATTG              |
| StyR248rev | CATCTACCCGGCTTAATTACGCTGAACGCTT                               |
| StyR280T7  | GATTAATACGACTCACTATAATTTACTTACCGGAGGCGACATGGACCCT             |
| StyR280rev | ACACACCGGTAAGACAGCAGAGGCAGGCT                                 |
| Sty296t7   | GATTAATACGACTCACTATACTGCAATGGGCTTCCGTTTCGCAGGGAAAGAG          |
| Sty296rev  | CGCCCGGATATAAGATTCCAGGTTGCCAACAGGGGC                          |
| RamRF2ntM  | GCGTATCTTTGCTTCTATAAatgagtgCTTAcactcatAATCAAGGGCTGCCGCATGA    |
| RamRR2ntM  | TCATGCGGCAGCCCTTGATTatgagtgTAAGcactcatTATAGAAAGCAAAGATACGC    |
| RamRF9ntM  | GCGTATCTTTGCTTCTATATACTcactcatAATCAAGGGCTGCCGCATGA            |
| RamRR9ntM  | TCATGCGGCAGCCCTTGATTatgagtgAGTATATAGAAAGCAAAGATACGC           |
| RamRF2     | GCGTATCTTTGCTTCTATAAatgagtgCTTAcactcatAATCAAGGGCTGCCGCATGA    |
| RamRR2     | TCATGCGGCAGCCCTTGATTatgagtgAGTAAAGcactcatTATAGAAAGCAAAGATACGC |

---

**Oligonucleotides used for Real-time PCR analyses**

---

|         |                        |
|---------|------------------------|
| ST173_F | CTGAGCCTGCTGGCTATTATG  |
| ST173_R | GAAAATTAACGCCGAAAAGA   |
| ST222_F | ATCGCCATTGCATCAGAC     |
| ST222_R | ACGGGTTACAGTGGTTGAC    |
| ST234_F | GCACAGCCAGTAAGAACGAGA  |
| ST234_R | GTTCCGGAGCGACCATT      |
| ST243_F | GCCTCTGCCAGTTGCTCAT    |
| ST243_R | GACGGCGTGGTTATCTGC     |
| ST315_F | CGGCTCGCTGCGAATAAT     |
| ST315_R | CTGTCCGGAAAGTCAACAACG  |
| ST322_F | CGTTCGGGCAGTTCCAAA     |
| ST322_R | GGCCGTCAACTGTGTTATCAA  |
| ST336_F | TCATCTGCGCCGACATTC     |
| ST336_R | AGTATGCGCCGGTGTGGA     |
| ST16S_F | GTTGTGGTTAATAACCGCAGCA |
| ST16S_R | CCAGTTTCGAATGCAGTTCCC  |

---

**Table S2. Compilation of 217 contigs of cDNA sequences derived from ORFs of *S. typhi* protein-coding genes.**

| ERNS        | cDNA (nt) | cDNA sequence                                                                                                                                                                                                                                                                                                                                                                                            | ORF                                                  | Comments           |
|-------------|-----------|----------------------------------------------------------------------------------------------------------------------------------------------------------------------------------------------------------------------------------------------------------------------------------------------------------------------------------------------------------------------------------------------------------|------------------------------------------------------|--------------------|
| 1. StyR-16  | 84        | ATACGAACCGTCAGATCCATGCGTTGCGTG<br>ATAACGTTGGGTTGGCGAAAGCGGAAGTG<br>ATGGCCGAACGGATTCCGGCAAATTA                                                                                                                                                                                                                                                                                                            | Conserved hypothetical protein                       |                    |
| 2. StyR-17  | 178       | ATGAATAAAATCGCCGAACCTCAAACGCGC<br>CAAACGCCTGGCGCTCTCACTGTTGCTGAT<br>AGCCGCCGCGACGTTTGTGACCACGCTTTT<br>CCTGCCGCCAGTTTTTGGGTGCTGAGCGT<br>AAAAGCTATTGCCGAAGCGGCGATGGTTG<br>GCGCGCTGGCGGACTGGTTTCCGTGGTGG                                                                                                                                                                                                    | Putative membrane protein                            |                    |
| 3. StyR-18  | 103       | ATTCCGCAAATCTCCACTGGCGATATGCTG<br>CGCGCCGAGTAAAATCAGGCTCCGAGTT<br>GGGCAAACAGGCGAAAGATaTCATGGACG<br>CCGGTAAACTGGTGA                                                                                                                                                                                                                                                                                       | Adenylate kinase                                     |                    |
| 4. StyR-21  | 353       | ATATATGAAACCGATGGTACTGGCGGATAT<br>CGCCCAGGCCGTCGAGATGCACGAATCCA<br>CTATATCCCGCTGACCACGCAGAAGTATT<br>TGCACAGCCCAGCGGGTATTTTTGAACTCA<br>AATATTCTTTTTCCAGCCACGTCAATACCG<br>AAGGCGGAGGCGAAGCCTCTTCCACCGCG<br>ATTCGCGCTGGTGAAGAAGTTAATTGCG<br>GCGGAAAACCCGCGAAAACACTGAGCGA<br>CAGCAAAGTTAACCTCTCTGTGTCAGAAC<br>AGGTATCATGGTGGCACGCCGACTGTTGC<br>GAAGTACCGAGAGTCTTTATCCATTCCGCC<br>GTCAAACCAACGGAAAACAGCTGGTTT | RNA polymerase sigma-54 factor (sigma-N)             |                    |
| 5. StyR-28  | 321       | GCTACATGGAGATTAACCTAATCTAGAGG<br>GTATTAATAATGAATCGTACTAAACTGGTA<br>CTGGGCGCGTAATCCTGGGTTCTACTCTG<br>CTGGCTGGTGTCTCCAGCAACGCTAAAAATC<br>GATCAGCTGTCTTCTGACGTTCCAGACTCTG<br>AACGCTAAAGTTGACCAGCTGAGCAACGA<br>CGTGAACGCAATGCGTTCCGACGTTCCAGGC<br>TGCTAAAGACGACGCAGCTCGCGCTAACCC<br>AGCGTCTGGACAACCAGGCTACTAAATAC<br>CGTAAGTAATAGTACCTGCGTAATAAAAAAT<br>GGCGCACATCGTGCGCCATTTTTTTT                           | Major outer membrane lipoprotein                     |                    |
| 6. StyR-31  | 94        | CCCAAATCAGCAAAGTGCGCACGGGTCGT<br>GCTTCTCCAGCCTGCTGGATGGTATTGTC<br>GTAGAATACTATGGCACTCCGACCCCGCTG<br>CGCCA                                                                                                                                                                                                                                                                                                | Ribosome recycling factor                            |                    |
| 7. StyR-32  | 96        | GTATTCGTCCGTTACATGATCGTGTGATCG<br>TCAAACGTAAGAAAGTTGAGTCCAAATCT<br>GCTGGCGGCATCGTACTGACCGGTTCCGCA<br>GCGGGTA                                                                                                                                                                                                                                                                                             | GroES protein                                        |                    |
| 8. StyR-33  | 113       | ATTATCAGAAATGACGATTTACGCATTAAG<br>AAATCAACGAGTTATTACCTCCGGTCGCGC<br>TGCTGGAAAAGTTTCCCGCCACGGAAAAT<br>GCAGCAAATACCGTTGCTCACGCA                                                                                                                                                                                                                                                                            | Phospho-2-dehydro-3-deoxyheptonate aldolase          |                    |
| 9. StyR-34  | 49        | ATTCGAACCTCCGTTGATCACGGCACCGCG<br>CTTGAACCTGGCGGGCCGAG                                                                                                                                                                                                                                                                                                                                                   | Pyridoxal phosphate biosynthetic protein PdxA        |                    |
| 10. StyR-36 | 175       | CCATGCGCTTGCCTAAGAGACGTCAGGTA<br>TCTATGGAGGAACAAGTTATGGATACAAA<br>CGAACTTGGCTTAGTTAAGGCGCGTGTGA<br>ACTGATCACCGCTATGCTCAAATGCGCAAC<br>CGCGTTTGTGGCTTAGTTGGTGGGTTTA<br>CGCCGTTCTTAACATGGCCCTCAACT                                                                                                                                                                                                          | Hypothetical protein (Specific for <i>S. typhi</i> ) | Overlap entire ORF |
| 11. StyR-37 | 228       | ATTTTTGAACTTTAACGAAAGTGCAAGAGG<br>GCAGCATGGAACCAAAGATCTGATCGTG<br>ATAGGCGGGGCATTAACGGTGCAGGCAT<br>CGCGGCTGATGCCGCCGACGCGGTTTGTG<br>CGTACTCATGCTGGAAGCGCAGGATTTGGC<br>CTGCGCAACCTCTTCCGCCAGTTCGAAACT<br>TATCCACGGCGGCTTACGCTACCTTGAACA                                                                                                                                                                    | Aerobic glycerol-3-phosphate dehydrogenase           |                    |

|     |         |     |                                                                                                                                                                                                                                                                   |                                                                                                                                     |                                    |
|-----|---------|-----|-------------------------------------------------------------------------------------------------------------------------------------------------------------------------------------------------------------------------------------------------------------------|-------------------------------------------------------------------------------------------------------------------------------------|------------------------------------|
| 12. | StyR-38 | 136 | CTACGAGTTCCGTCTGGTCA<br>TTACGGCGGATCGCTGACTTATGCAATCGG<br>CGAAGGCTTCTGTGCGGTGGCGCTATCAC<br>CACGTCTAAACGTAAGTCCGATCAGAACA<br>ACACCGCTAACGCTCGCCTGTATGGTAACG<br>GCGATCGCGCCACGGAA                                                                                   | Outer membrane protein<br>C                                                                                                         |                                    |
| 13. | StyR-39 | 144 | TTTTTTGTGCGCCCGACTGGCTTGCCGAA<br>CATATTGATGATCCGGAAATACAGATTCTT<br>GACGCCGTATGGCGCCACCAGGACAGGA<br>ACATCGTGATATGGCGGGCGAATATCGCG<br>CCGGACATATTCCCGGCGCGCTGTTT                                                                                                    | Putative thiosulfate<br>sulfurtransferase                                                                                           |                                    |
| 14. | StyR-40 | 133 | ATCAGCCGCGAAGTAAATTCCTTACTGC<br>GCTTTCCGATCTGGAATTAAGAAAGATTAG<br>AGAAAGAGGTCAACTGGAATCCTTAAGGC<br>ATGAACTAAGAACTCAAGGCATGACTTGC<br>AAGGAAAACGTGTG                                                                                                                | Hypothetical protein                                                                                                                |                                    |
| 15. | StyR-41 | 122 | TACGGCAGCGCAATTTGCGAAAGGCGTGC<br>AGTTGCATAATGAAAAAGATCTCACTAAA<br>CCCCTACGCTGGAGGTGATAACACCTGTG<br>CAGGTCCTGCTGACCATCAGCGAAGGCCGT<br>TATA                                                                                                                         | Ribosomal small<br>subunit pseudouridine<br>synthase                                                                                |                                    |
| 16. | StyR-42 | 122 | ATGTAAATACTCACTCACCTGGAGAAA<br>ATGTGCGAAAGATAACACTACGGAACATCT<br>GCGCGCTGAGTTGAAATCCCTGACCGATAC<br>GCTCGAAGAAGTGCTGAGCTTTCGGGCG<br>AAAA                                                                                                                           | Conserved hypothetical<br>protein                                                                                                   | Overlap putative 5'-<br>UTR- 30 nt |
| 17. | StyR-43 | 115 | CTTTAGGAACGCAATCGCAGTAATGAAGC<br>AACTTTGGTTTGCCATGTCCCTTGTTGGCGG<br>CTAGCCTGTTCTTCTCAGTAAACGCTCGG<br>CCGACCCTGCGTCCGGGGCGTTATT                                                                                                                                    | Sigma-E factor negative<br>regulatory protein, rseA<br>Sigma-E factor<br>regulatory protein RseB<br>precursor, rseB<br>SufI protein |                                    |
| 18. | StyR-45 | 156 | CATTTTTTCAGGCACAACCTCTTAGCCTGTT<br>TTACATGGAGCTTATATGTCATTACAGTCGG<br>CGTCAGTTTCTTCAGGCATCGGGAATCGCA<br>CTATGTGCAGGCGGATTCCCCTCAGGGCG<br>AATGCTGCCGTCAGCAACAGCCGTTGCCT<br>GTTCC                                                                                   |                                                                                                                                     | Overlap putative<br>5'UTR- 46 nt   |
| 19. | StyR-46 | 136 | ATAACGCATTGCTGGAGCTAGAATTAATG<br>TCATATATCGTTTCGTTTCACTGGGCTACTA<br>CTACTCAACGCATTTATTGTGCGCGGTAGA<br>CCGGTGGGCGGCATTCAACATTAAGTCAGC<br>TCGAAGTCAAACAAAA                                                                                                          | leu operon leader<br>peptide                                                                                                        |                                    |
| 20. | StyR-48 | 93  | TTTTGGCGGCGCGCTGGACATGCTGGAAGA<br>GAACCCGCTACCGGGCGGTGGCGGTGGTGA<br>TCCCAAGCTGGACTTTCAAAGTACCGCCT<br>CGCT                                                                                                                                                         | cell division protein                                                                                                               |                                    |
| 21. | StyR-49 | 90  | ACAAAAATGACAGCCCTTCTACGAGTGATT<br>AGCCTGGTCGTGATTAGCGTGGTGGTGATT<br>ATTATCCACCGTGCGGGGCTGCACTTGGGA                                                                                                                                                                | ilvGMEDA operon<br>attenuator peptide                                                                                               |                                    |
| 22. | StyR-52 | 194 | TATCGAACTATGCGCCAGGCGGACGCG<br>AATACCCACAGCTTGACGGTATTTTTTGCA<br>CCAACGATGACCTGGCGGTGGGGGCGGCM<br>TTCGAATGCCAGCGCCTGGGGCTAAAAATC<br>CCGGACGACATGGCGATCGCCGGGTCCA<br>CGGTCATGACATCGGCCAGGTGATGGAAC<br>CGCGTCTGGCAAGCGTCC                                           | gluconate utilization<br>operon repressor                                                                                           |                                    |
| 23. | StyR-57 | 232 | ATGATGAGTACTGAAATCAAACTCAGGT<br>CGTGGTACTTGGGGCGGGCCCGCAGGCT<br>ATTCTGCGCTTTCCGTTGCGCTGATTTAG<br>GTCTGGAAACCGTAATTGTAGAACGCTACA<br>ACACCCTTGGCGGTGTTGTCTGAACGTCG<br>GCTGTATCCCTYCTAAAGCGCTGCTGCACG<br>TAGCAAAAAGTTATCGAAGAAGCCAAAGCG<br>CTGGCTGAACACGGTATCGTCTTCG | dihydroliipoamide<br>dehydrogenase                                                                                                  |                                    |
| 24. | StyR-60 | 113 | ACTTGCTTTATTTCTGCTCTCTTTAAGGAAA<br>TCTCATGCTCAAATCGACTCTGGCGGCTGT<br>CRCAGCTGTTTTGCTCTTTCTGCTCTTTCT<br>CCCGTAGCGTTGGCAGCAAAA                                                                                                                                      | peptidyl-prolyl cis-trans<br>isomerase                                                                                              |                                    |
| 25. | StyR-61 | 75  | CTATAAAGTCTCCGGTGGTCTGCACGGGGT<br>GGGCGTCTCGGTAGTCAACGCTCTGTCGCA                                                                                                                                                                                                  | DNA gyrase subunit B                                                                                                                |                                    |

|     |         |     |                                                                                                                                                                                                                                                                                             |                                                             |                                                            |
|-----|---------|-----|---------------------------------------------------------------------------------------------------------------------------------------------------------------------------------------------------------------------------------------------------------------------------------------------|-------------------------------------------------------------|------------------------------------------------------------|
| 26. | StyR-62 | 201 | AAAACCTGGAGCTGGT<br>ATATTTCTAACCATAAACCCTACGTTACCT<br>CATTCAGACATGGGATAATCGGAGCGATA<br>AGCCCGGCTTTTGGCATGAATTTAGAAAAA<br>ATCMACGAGTTAACCGCGCAAGATATGGC<br>GGGTGTCAATGCGACAATCCTTGAACAGCT<br>TAATTCGACGTTCAACTGATTAATCAGCT<br>AGGATATTACATTATTAGCGGCG                                        | Octaprenyl-diphosphate<br>synthase                          |                                                            |
| 27. | StyR-63 | 142 | CTTCCTTTAAATCCACACGTATCCAGCACG<br>AAATAATATGCAAAAAGTTTGATACCAGGA<br>CCTTCCAGGGCTTGATCCTGACCTTACAGG<br>ATTACTGGGCTCGCCAGGGCTGTACCATTG<br>TTCAACCATTGGACATGGAAGTC                                                                                                                             | glycine-tRNA<br>synthetase, alpha<br>subunit                |                                                            |
| 28. | StyR-65 | 160 | CTTTTATTAACATAAAGGAGTACATAATGCG<br>CGTAGCGAAAAATCGGGGTGATCGCCCTTTT<br>CCTGCTGATGGCTATTGGCGGGATCGGCGG<br>CGTGATGCTGGCAGGTTACAGTTTTATTT<br>GCGTGCCGGGTAAGCGCGCGCTCAGCCTT<br>TCAAACAGGC                                                                                                        | Hypothetical protein                                        |                                                            |
| 29. | StyR-67 | 36  | TTACATGGAAATTTATGCCGCGATGGACCG<br>CCTCCG                                                                                                                                                                                                                                                    | Putative exported<br>protein                                |                                                            |
| 30. | StyR-73 | 153 | ATTCCTTACGTGCGAAAGTTTCTACCGGC<br>ACGCCGCAAAGCCCCTACGGCAAAAAGTAA<br>ATTGATGGTAGAACAGATCCTCACCAGTCT<br>GCAAAAAGCCCAGCCGAGTGGAGTATTG<br>CGCTGCTGCGTTATTTCAATCCGGTCGGCG<br>CGCAC                                                                                                                | UDP-glucose 4-<br>epimerase                                 |                                                            |
| 31. | StyR-75 | 132 | ATAGATCAATAGCGGAATCTCATGTACTCA<br>TGAACACTGAAAAACCGTCGGTAGCTCAC<br>AACGTTGACCATAATGAAATCGCCAAATTC<br>GAAGCCGTCGCGTCCGCGTGGTGGGATCTG<br>AAGGGCGAATTCA                                                                                                                                        | 3-demethylubiquinone-9<br>3-methyltransferase               | Overlap putative 5'-<br>UTR-28 nt                          |
| 32. | StyR-79 | 91  | TTAAATGAGCGANAAACGTTGATGTCGAA<br>TTCTTATGACTCCTCCAGTATCAAAGTCCT<br>GAAAGGGCTGGATGNGGTGCGTAAGCGCC<br>CGG                                                                                                                                                                                     | DNA gyrase subunit B                                        | Overlap putative<br>5'UTR-21 nt                            |
| 33. | StyR-80 | 121 | ATTGCAATATCAGACACAGCGGCTGGAATT<br>TGATTATTATGCCCTGTGTGTTTCGTCATCCC<br>GTTCCCTTTACCCGGcTAAAAATATCGCTTC<br>GTACCACTTATCCTCAGGCGTGGGTAACG<br>ATGTA AAAACAGCCGAACTCTGCGCCGC<br>GCTACGAAAAGTCAAGGCAGACAAAAAATG<br>ACTCAGCATACTCAAACCTTCAATGCCT<br>TCTCCGCTCTGGCAATACTGGCGCGGTCTT<br>TCCGGCTGGAAC | Cell-division regulatory<br>protein                         |                                                            |
| 34. | StyR-81 | 130 | TTTCTCAAGCGTGTGGGTTACGTAAACC<br>GCGTATCGCCGTGGCAGGCGTGAATCCTCA<br>TGCGGGCGGAGAATGGTCTGTTGGCGATGA<br>AGAGACgCGTATCCTGACGCCAGCCATTAC<br>CGATGCCCGCGCAAA                                                                                                                                       | Putative membrane<br>protein                                | 5' and 3' overlap of two<br>putative ORFs,<br>respectively |
| 35. | StyR-82 | 135 | GGCTTATATCCTCAAAAACAACGGTGGTCC<br>GACATATAGAGGGcCACCTTCT                                                                                                                                                                                                                                    | PdxA-like protein                                           |                                                            |
| 36. | StyR-83 | 52  | GGCTTATATCCTCAAAAACAACGGTGGTCC<br>GACATATAGAGGGcCACCTTCT                                                                                                                                                                                                                                    | Penicillin-binding<br>protein 3 precursor                   |                                                            |
| 37. | StyR-84 | 77  | ATTCGAAATCACATATATCCTGTGTGTTTT<br>AAAGTAAAAATCATTGGCAGCTTGAAAAA<br>GAAGGTTACATGTCAAA                                                                                                                                                                                                        | Aspartate ammonia-<br>lyase<br>and Hypothetical<br>protein  |                                                            |
| 38. | StyR-85 | 72  | TTTGCTGTGTAATGGAAATCTCACTATGGT<br>CATTAAAGGCGCANAGCCCCGGGTTTCGC<br>GGAAGAGTATAT                                                                                                                                                                                                             | Fatty acid-fatty acyl<br>responsive DNA-<br>binding protein |                                                            |
| 39. | StyR-86 | 87  | AAAATCGGTCACGTTAGCGGAAAAAGAAA<br>ACGTTTATTTCCCGACGCCATCACCGAAC<br>GAGGGCAAAAACATCTTCGGGAGTTGAT                                                                                                                                                                                              | Sugar fermentation<br>stimulation protein                   |                                                            |
| 40. | StyR-87 | 59  | ACGGAAGCGGTGCGCCTGCTGGAAGCGTG<br>TCCGCTCTTCAATGCGGGTATCGGCGCGGT                                                                                                                                                                                                                             | Putative L-asparaginase                                     |                                                            |

|     |          |     |                                                                                                                                                                                                                                                                                                     |                                                                        |                                                |
|-----|----------|-----|-----------------------------------------------------------------------------------------------------------------------------------------------------------------------------------------------------------------------------------------------------------------------------------------------------|------------------------------------------------------------------------|------------------------------------------------|
| 41. | StyR-89  | 141 | CTTATGGTATCAACGACGTCCAGGATATCG<br>TTTACAATCCCAGCTACGACACCCTTTATC<br>AGGAAGAACTTAATCCTGGTCTGGAAGGC<br>TATGAGCGTGGCGTGTAACTAACCTGGGC<br>GCTGTTGCCGTTGATACCGGTA                                                                                                                                        | Phosphoenolpyruvate<br>carboxykinase                                   |                                                |
| 42. | StyR-91  | 196 | ATTACTAAAGCCGCTAACGACGACCTGCTG<br>AATTCCTTCTGGCTGCTGGACAGCGAAAAA<br>GGCGAAGCGCGCTGCATCGTTGCAAAATC<br>CGGCTTGGCTGAAGATGAAGTTGTGGCTGT<br>CAGCAAACCTGGGCGAGATTGAATACCGTG<br>AAATCCGATGGAAGTTAAACCGGAAGTA<br>CGCGTTGAAGCGGTCAGC                                                                         | Conserved hypothetical<br>protein                                      |                                                |
| 43. | StyR-92  | 125 | CTGCTGACCTGCCTTTTGCACAGTCGCGTT<br>TTTGGCGCGGGAAGGCCTGAGCAACGTT<br>ATTACGCTTTCACCTCTGCGTAATAACGAG<br>TTTCTAAAAAACTACGGCGTCGAAATCGTT<br>GACGGC                                                                                                                                                        | Thiol peroxidase                                                       |                                                |
| 44. | StyR-93  | 260 | ATTTATTACATTCGCGTTCCTAATACAAAT<br>ATTTTGTCCAGTGTCTTAACCAACTTGAT<br>ATAGCGGAGCCGAAATACATTTCCATAAA<br>AGAACGTTATTAAGCGTGGCGACGCTTGGT<br>ATGTTGGCTGTTTCAGTCGACTGATGGTA<br>GTTTGGGTACGAAACAGTAACCATAGTTCT<br>ATTAATACTAATGAATTTTTATGTACGACN<br>AGAACGGTAACGACGATAACNGCCTAAAGA<br>TATCCATGCCGATGGCAGTCTT | hypothetical protein<br>possible<br>transmembrane<br>regulator         |                                                |
| 45. | StyR-95  | 129 | AAAAGCATGGATTTCGCGGCGAAGATATGT<br>TGATTTGTTCAAAGCGTGAAATCAGCGACT<br>ATATGCTGCAACTACTCGTTAAGAAAATA<br>AGTTTAAGGAATCAAAGTAATGACAGCAA<br>ATAACCTGCGT                                                                                                                                                   | putative dehydratase<br>RfbH<br>CDP-glucose 4,6-<br>dehydratase        | 5' and 3' overlap of two<br>ORFs, respectively |
| 46. | StyR-96  | 125 | ATACGGAATCACCGTTGGTCTCGATAGATT<br>TTAACCACGACCCGCACAGCGCCATTGTTG<br>ATGGCACGCAAACCCGGGTCAGTGGCGCC<br>CACCTGATCAAGACGCTGGTCTGGTGCAT<br>AATGAA                                                                                                                                                        | D-erythrose 4-<br>phosphate<br>dehydrogenase                           |                                                |
| 47. | StyR-98  | 51  | ATCTACTCAAAGCAAACTCGCTCACATCGCC<br>AGTACCTGGGAGCTGGCGGAA                                                                                                                                                                                                                                            | Putative dimethyl<br>sulphoxide reductase<br>subunit                   |                                                |
| 48. | StyR-100 | 156 | GTTGAATCGCGACAGAAAAGATTTTGGGA<br>GCAAGCGATGCGCAAAGTTACGCTGCTGT<br>TATGGCCTCAACGCTGGCATTTCAGTTTTTT<br>AAGCCACGCAGCTGAAGTTGTACAAGCG<br>ATAACTGGCACCCCGGTGACGGGGCCACG<br>CAGCGTAGC                                                                                                                     | extracytoplasmic stress<br>protein for protein-<br>mediated toxicities | Overlap putative 5'-<br>UTR- 36 nt             |
| 49. | StyR-102 | 178 | ATTAATTGAAAAAATGCAGGCCGGACGCA<br>TTCGCGGACTGGTGGTGATTCCGGTGGATT<br>TCGCGCAGCAAATGGCGCGCGACGGTGAC<br>AGCGCGCCGATTTCAGGTGATTACCGACGG<br>CAGCGAGCCAAAATACCGCAACTTCGTTCA<br>GGGCTATGTTGAAGGCATCTGGCAAATCTG<br>G                                                                                         | putative inner<br>membrane protein                                     |                                                |
| 50. | StyR-104 | 181 | CTTCGCAAAAAGAGTTGACGCTGCAGCCGTT<br>CAATCACTGGGCGTTTCATTCCTGTCAACTT<br>AATCCTTGAAGGGGTAAGTCTGCTGTCCAA<br>ACCGGTTTCTCTCGTCTGCGACTGTTCGG<br>CAACATGTATGCCGGTGAGCTGATTTTCAT<br>TCTGATTGCTGGTCTGTTGCCGTGGTGGTC<br>A                                                                                      | ATP synthase A chain                                                   |                                                |
| 51. | StyR-105 | 100 | CTTCATCGAATCGCTGTTAGCGCCGTGGCG<br>CGAAGGGCCATTTCAGCAAGCACTTCAACT<br>GGCAGAAAATTGAAGCGCTCAAGCCTTTC<br>GGCGGTATTCGC                                                                                                                                                                                   | proline dipeptidase                                                    |                                                |
| 52. | StyR-106 | 120 | TTAATTACATCTGTCATAAGAGAGTACTA<br>ATGGATCGTATCATTACATCATCGCGTGAT<br>CGTAGCTCGCTACTGAGTACGCACAAAGTA<br>CTGCGCAACACCTATTTCTGTTGAGCCTG                                                                                                                                                                  | putative membrane<br>protein                                           |                                                |
| 53. | StyR-107 | 137 | ATTCCTCGATATGATCACGCCGAATATCT                                                                                                                                                                                                                                                                       | phospho-2-dehydro-3-                                                   |                                                |

|     |          |     |                                                                                                                                                                                                  |                                                                                                                           |                                       |
|-----|----------|-----|--------------------------------------------------------------------------------------------------------------------------------------------------------------------------------------------------|---------------------------------------------------------------------------------------------------------------------------|---------------------------------------|
|     |          |     | GGCCGATCTGATGAGCTGGGGCGCCATTG<br>GCGCACGGACTACTGAATCCCAGGTTTCATC<br>GCGAACTGGCGTCTGGCCTCTCTTGTCCGG<br>TCGGTTTTAAAAATGGTA                                                                         | deoxyheptonate aldolase                                                                                                   |                                       |
| 54. | StyR-108 | 126 | ATTTTTTGGCAGACAAGGAGAGACGCGTG<br>AGGCGATTGCCGGGGATTTTATTGCTCACT<br>GGAGCCGCGCTCATCGTCATTGCAGCGCTG<br>CTGGTTAGCGGGCTGCGCCTGGCGTTGCCT<br>CATCTTG                                                   | possible exported<br>protein                                                                                              | Overlap of putative 5'-<br>UTR- 27 nt |
| 55. | StyR-109 | 131 | ACGACGCCGTGAACGACAGCGGTAAACGC<br>GCCGCGATGTTTGGTTCCGTGGCGGTGATC<br>CGCGAGTCCGGCGTTCACAGTCTGCGCGTT<br>GGCGATATCTATTACGTCGGACATCTGCCG<br>TGGTTTGAGCGG                                              | putative polysaccharide<br>biosynth protein subunit<br>B                                                                  |                                       |
| 56. | StyR-110 | 79  | GTTTGAACCTATGGAATAACCAACGACGC<br>GGTGATTACAGTCATCGGCGTCGGTGGTGG<br>CGGCGGTAACGCTGTTGAA                                                                                                           | cell division protein<br>FtsZ                                                                                             |                                       |
| 57. | StyR-112 | 46  | AGTTATGCGTCGGTTTGCTCCATTGATAGC<br>AGCGCTGTTATTAAGC                                                                                                                                               | putative exported<br>protein                                                                                              |                                       |
| 58. | StyR-113 | 69  | AGCTAACCTGAACGATCAAATCTCCCGTAT<br>GACGGGCGTAGGCGGGGCGCATCGCCGA<br>ACGACCTGCT                                                                                                                     | flagellar hook-<br>associated protein 1                                                                                   |                                       |
| 59. | StyR-114 | 87  | CTTATTGGACATACTCAACCGCGTCGTCTG<br>GCGGCGCGCACCGTCGCTAACCGCATTGCC<br>GAAGAGTTGCAAACGGAGCCTGGCGGC                                                                                                  | ATP-dependent helicase<br>HrpA                                                                                            |                                       |
| 60. | StyR-115 | 70  | ATGTCTCAATTGATGCAATTAAGGACGTC<br>GCCGAGACACCCGCTGGGGCCGCTTTCC<br>GGCGAAGTAA                                                                                                                      | vitamin B12 ABC<br>transport ATP-binding<br>protein<br>putative glutathione<br>peroxidase/vitamin B12<br>transport per... |                                       |
| 61. | StyR-116 | 26  | TCGGTTGAATGCCATCGTTGCCTGGA                                                                                                                                                                       | ferredoxin-type protein<br>NapF                                                                                           |                                       |
| 62. | StyR-117 | 119 | CTCTATCTTTACGGCCACTGCGCTGAAGGC<br>GACTGCCCGAAGACGAGCACGCGCACGA<br>TGACGCGACTAAATAAGTGTAATCTTTTCG<br>AAGAGCCAACCGCCCGTTGGCTTTTTTAT                                                                | ferric uptake regulation<br>protein                                                                                       | Overlap of putative 3'-<br>UTR- 44 nt |
| 63. | StyR-118 | 78  | AAAAAATGCCTCCTTCCGAACCGGGCGCAA<br>GAAGAGGAAGAAAAGCGGGCCGCTGAACCT<br>CTCCACGCCCTGGCCCATCA                                                                                                         | putative exported<br>protein                                                                                              |                                       |
| 64. | StyR-120 | 175 | AAGTGTATCCTGGCTTTTATGAAGAGAGAA<br>ACTGGTGGACGAACTGACAGCGCAGGCAT<br>TGAAAGCCTTACGACGCTTACTGCGACG<br>CGTGGCAAGAAAAACACGGTAGCTGGCCG<br>TTGAGCGAAGAACTGTATGGCGTACCTTCT<br>CCGTGCATTATTTCTCAACCCGCGAT | syd protein                                                                                                               | Overlap of putative 5'-<br>UTR- 35 nt |
| 65. | StyR-121 | 71  | GCTAAAGACCAGGCTGGCATCGACAAAAAT<br>CATGATCGACCTGGACGGTACTGAAAACA<br>AATCTAACTTCGG                                                                                                                 | enolase                                                                                                                   |                                       |
| 66. | StyR-123 | 24  | CTATCTGCTCATTGCCGGAACCTA                                                                                                                                                                         | putative membrane<br>protein                                                                                              |                                       |
| 67. | StyR-124 | 35  | CTTCTCTGACGACAAAGGCAGCGACGGCG<br>ACCAGA                                                                                                                                                          | outer membrane protein<br>C                                                                                               |                                       |
| 68. | StyR-125 | 38  | GTTGGGCATCGCCGAAAAAAGCCTTTTAGG<br>TTCGGCGT                                                                                                                                                       | sigma-E factor<br>regulatory protein RseC                                                                                 |                                       |
| 69. | StyR-127 | 48  | ATGAGAACCCGCGTAACGTAGGGTCGTTTG<br>ACAACAACGACGATAACG                                                                                                                                             | NifU-like protein                                                                                                         |                                       |
| 70. | StyR-129 | 27  | ATTTGAAAAATGCTCTGAAAATCCCGG                                                                                                                                                                      | conserved hypothetical<br>protein                                                                                         |                                       |
| 71. | StyR-130 | 79  | ATTCTCATTAACGCCTGCCGCGCCCGGTG<br>GTGGATAACGCCGATTGTGGCGCGACTC<br>AATGCCGGGCAGCCGCTGA                                                                                                             | erythronate-4-phosphate<br>dehydrogenase                                                                                  |                                       |
| 72. | StyR-131 | 49  | ATTATTGTCGTCGCTGTTTAAAGTGAGCA<br>GCTATCATCAGGCTAAGGC                                                                                                                                             | putative membrane<br>protein                                                                                              |                                       |

|     |          |     |                                                                                                                                                                                                                                        |                                                              |                                                              |
|-----|----------|-----|----------------------------------------------------------------------------------------------------------------------------------------------------------------------------------------------------------------------------------------|--------------------------------------------------------------|--------------------------------------------------------------|
| 73. | StyR-132 | 162 | TTATCGACGATCCGGTTGCCGGGACGCCG<br>TGGTGGTACCGCTGGGGCGCGATAGTCG<br>CCCACACAGATGACAAAAGCCGGATATCGC<br>TATCCGGCTTTTCGGGTAAATCAGACTAAC<br>CGTTCACTATCGCCAGCGGTTTTCCATT<br>TACGCGAGACCAT                                                     | ferric enterobactin<br>transport ATP-binding<br>protein FepC |                                                              |
| 74. | StyR-133 | 67  | ATCGAAGACGAGGTAGCGACTATACTTGCT<br>GGTTTCGGTCAGGGAGAANGGCACGTCTTT<br>AACCTTG                                                                                                                                                            | uroporphyrinogen<br>decarboxylase                            |                                                              |
| 75. | StyR-135 | 70  | ATTCATCCGCTGATTGACGCGCTGGACGAT<br>GCGAAACTGGCGCCGATTGCGGCCAAAGC<br>GCTGTCTACA                                                                                                                                                          | aconitate hydratase 2                                        |                                                              |
| 76. | StyR-138 | 42  | CTTTGCCGATATTCCGGGAGTGATCACGCC<br>GTATCACTGTA                                                                                                                                                                                          | hypothetical protein                                         |                                                              |
| 77. | StyR-139 | 138 | CTATCATCGCGACGGCGCTAATCGATACCG<br>GTTCCAAGATGGACGAAGTTATCTACGAA<br>GAGTTTAAAGGCACCGGTAACATGGAGCT<br>GCATCTCTCGCGTAAGATCGCTGAAAAACG<br>TGTCTCCCGGCTATCGACT                                                                              | transcription<br>termination factor                          |                                                              |
| 78. | StyR-140 | 125 | TTTTGAACTCATCATCGACTATGTATCGC<br>TGGAGAAAAGAATTGGCAGTAAAAATTGG<br>AGTACGTGAGCCGCGCTATCTGTTATTGCC<br>GGATTCACTTTACTGTAATGCGGTAA<br>TTTTTA                                                                                               | Vi polysaccharide<br>biosynthesis protein                    |                                                              |
| 79. | StyR-144 | 77  | GTAATCTGACGTAAGTACTGACCGTTTCTACC<br>GTAACTCTCAGGATCAGGTAACCCAAAA<br>ACCCCTGCGTGACTCGGT                                                                                                                                                 | Fis DNA-binding<br>protein                                   |                                                              |
| 80. | StyR-146 | 173 | ATTACACCGGATCTGATTGAGATCCTGCTG<br>AGCATTCTCAAAGCGGTGGTATTCTGCTG<br>GTGGTCGTCACCTGCGGGGCTTCATGAGC<br>TTTGGCGAACGTCGTCGCTGGGTCTGTTC<br>CAGAACCCTTATGGACCAAACCGCGTTGG<br>CTGGGGCGGCTCGCTCCAGCTGGT                                         | NADH dehydrogenase I<br>chain H                              |                                                              |
| 81. | StyR-147 | 203 | TTGCACAGCGTTTGATCGTCCAGGATAAAG<br>CATCTGCGATGTTCCCGCTCGGTATCAACG<br>AAGAGATGGCAAACACACTGGGCGCGTTG<br>ACCCTGCCGACAGATGGTCAAACCTGGCGGA<br>GACGAACCAGTTAGTTTGTCAATTTCCGGTT<br>TGACGATCATCAGACGATCACCCGTTTGAC<br>TCANGATTGCGCGCTCGATGACTTA | flagellar transcriptional<br>activator FlhD                  |                                                              |
| 82. | StyR-148 | 96  | ATCGTGCTGCTGGTGGCGTCTATTTACTTC<br>GGCGGCGTAAATGCCACGACCCGTAAGTGG<br>GGCCCGGCGCTGACCTTTAAAGACACCACC<br>ATTACC                                                                                                                           | probable carbon<br>starvation protein                        |                                                              |
| 83. | StyR-152 | 81  | CTAAACCAGAAACCGTAAAACGCGACTGG<br>TATGTTGTTGACGCGACCGGTAACACTCTG<br>GGCCGTCTGGCTACTGAACTGG                                                                                                                                              | 50S ribosomal subunit<br>protein L13                         |                                                              |
| 84. | StyR-153 | 88  | GATCATCAAGTTTGTGATCAGCTGAAAAA<br>AGCGGGGACGGTAACACTACGACGCGCTGG<br>GCGCGGTATGTACACCCTGCTCAGCGTA                                                                                                                                        | putative inner<br>membrane protein                           |                                                              |
| 85. | StyR-154 | 26  | CTCTGGGAACCTCTGTACGCTGCTA                                                                                                                                                                                                              | phosphoenolpyruvate<br>carboxylase                           |                                                              |
| 86. | StyR-155 | 66  | CTCTCCGAAAAATCTCATCTGATAGCGCCG<br>CCGTGCGACAGGGTATGCTACCCTGTCGCG<br>CAAATT                                                                                                                                                             | putative hydrolase<br>putative membrane<br>protein           | 5' and 3' overlap with<br>two putative ORFs,<br>respectively |
| 87. | StyR-156 | 78  | ATTAACGATAACATTGACCTGTAGACCTGA<br>TTATCATGGACAAATTTGACGCTAATCGCC<br>GCAAGCTGCTGGCGCTTG                                                                                                                                                 | putative exported<br>protein                                 | Overlap of putative 5'-<br>UTR- 35 nt                        |
| 88. | StyR-157 | 50  | ATCCGCGCGCTGGACGGCGATATGCAGGG<br>ACGCTGCTGGCGGCCATGA                                                                                                                                                                                   | putative glycerol<br>metabolic protein                       |                                                              |
| 89. | StyR-158 | 122 | ACATCAGGCGATTGTGCGTAAAGTGGCTGG<br>AAGCGCGCAACCTTGAAGAAGTCCGAACC<br>AGCGAACTTTTCGACGTTTGGTGGGACTAA<br>TAAGTACAGGGTCGGCAAATGCCGGCCCC<br>CTTTG                                                                                            | conserved hypothetical<br>protein                            | Overlap of putative 3'-<br>UTR- 34 nt                        |
| 90. | StyR-159 | 116 | TTTTTGAAACGCATGCGTCGCCGGGGCGGC<br>GAATTTATTATCGATACCGTGGAGGCCGTT                                                                                                                                                                       | L-isoaspartyl protein<br>carboxyl                            | Overlap of putative 3'-<br>UTR- 19 nt                        |

|      |          |                                                             |                                                                                                                                                                                                                                                                                                                                          |                                                     |                                       |
|------|----------|-------------------------------------------------------------|------------------------------------------------------------------------------------------------------------------------------------------------------------------------------------------------------------------------------------------------------------------------------------------------------------------------------------------|-----------------------------------------------------|---------------------------------------|
|      |          | CGCTTCGTCCCGTTAGTCAAGGGAGAGCTG<br>GCCTAGTTTGCCTGCAAAACAGCCA | methyltransferase type<br>II                                                                                                                                                                                                                                                                                                             |                                                     |                                       |
| 91.  | StyR-160 | 37                                                          | ATTATAACAATGGCAACTTATCTCATCGGC<br>GACGTTTC                                                                                                                                                                                                                                                                                               | bis(5'-nucleosyl)-<br>tetraphosphatase              |                                       |
| 92.  | StyR-162 | 130                                                         | ACGCAGATAAAGACAGCGGCCAAAGCGTA<br>CCGCTGGACACCAAGTCCCGCGACAAGCCA<br>GGATACGACGCCAGCGCAAACGGCTCCGG<br>CTCCTGCGACGCCGGTTGATTGACGCGCGG<br>CAACGCAAAATAC                                                                                                                                                                                      | putative DNA-binding<br>protein                     |                                       |
| 93.  | StyR-163 | 130                                                         | CCGCCGCTTTATGAAAGAGCCGAGGAAG<br>TGCGCATTCAAGTCCAGCGTGACTACCCGTC<br>CTGACATCAGCCAGAGCTACTGGACTGTCT<br>GGGGTATGCGTAAAAACGAAGCACTGGTG<br>CGTTTCCTGGAA                                                                                                                                                                                       | ATP-dependent RNA<br>helicase (dead-box<br>protein) |                                       |
| 94.  | StyR-164 | 290                                                         | ATTGAAGCCGCTGAGAGCAGCCGCATGTG<br>CGATGATGTGGCCGGTTGGGCCACTGCGCT<br>ACAGTTGATCGCCCTCTCCGCGCGCCAGAA<br>CCATACCTCTGCGCATCACTCCGCCCGCCG<br>TCTTGCCGGGATTAATGCCAGCCACCTTTC<br>TGATTATCTGGTGGACGAAGTACTGGATAA<br>CGTGGATGTCAGCACCCGACATTTCTTACT<br>TAAAAGCGCGATCTTACGCTCAATGAATGA<br>CGCGTTGATCGTGCGCGTGACCGGCGAAG<br>AAAACGGCCAGATGCGGCTGGAAA | MalT regulatory protein                             |                                       |
| 95.  | StyR-166 | 117                                                         | CACTTCTCACGTTGAATACGATACCCCGAC<br>CCGCCACTACGCACACGTAAGACTGCCCGG<br>GGCAGCCGACTATGTTAAAAACATGATC<br>ACCGGTGCTGCTCAGATGGACGGCGCGAT<br>TTGTTTTAGTCAACGGAGTATTACATGTCC<br>AGAAGGCTTCGACAGAACCAAAATCGTTAC<br>CACGTTAGGCCCGGCAACTGACCGCGATA<br>A                                                                                              | elongation factor Tu                                |                                       |
| 96.  | StyR-167 | 89                                                          | CTTACTCGATCCTGCGCGTGCGGGGGCTAC<br>AGGAGTGAT                                                                                                                                                                                                                                                                                              | pyruvate kinase A                                   | Overlap of putative 5'-<br>UTR- 25 nt |
| 97.  | StyR-168 | 39                                                          | AAAAACTGGCGAAAGACGACGCGGAAAAA<br>TACCAACCTTCTGGAAACAGTTCGGTCTG<br>GTGTTGAAA                                                                                                                                                                                                                                                              | putative RNA<br>methyltransferase                   |                                       |
| 98.  | StyR-170 | 68                                                          | TTTCTCTCACGTTACGGCGATGCAATGCC<br>CGCGTCCGCCACCGCAT                                                                                                                                                                                                                                                                                       | heat shock protein HtpG                             |                                       |
| 99.  | StyR-171 | 49                                                          | ATCACTCAATAGCGGGATAAAACAATGAA<br>CGACAGTGAATTTATCGCTGGCTGACG<br>TAATGAACCCCTTCCATGCTGAACGCGACCC<br>TACTAACAACTGCGCCATCTCGCGCAGTGG<br>T                                                                                                                                                                                                   | coproporphyrinogen III<br>oxidase                   |                                       |
| 100. | StyR-174 | 58                                                          | TCTTTATGACGTGAAAAATGAAATCCAGCG<br>CGCGCTGGAGCGTAAAGTTGAACTCAAGT<br>CTGGCGGTTATCTGATTA                                                                                                                                                                                                                                                    | CyaY protein                                        | Overlap of putative 5'-<br>UTR- 11 nt |
| 101. | StyR-176 | 61                                                          | CTCCTAAAAACTCTCACATCGCGCCGCCAG<br>GTACTCAAAACAGGTCTGGCGGCCCTGAC<br>GC                                                                                                                                                                                                                                                                    | ilvBN operon attenuator<br>peptide                  |                                       |
| 102. | StyR-177 | 77                                                          | AATTTGAAAGACAAATAACAGGAGTCATT<br>GTGGTAATTGGACCTTTTATTAACGCTGGC<br>GCAATTTTATTCGGCGGCGTTATTGGCGC<br>ATCTGGCGCAAAATGCAGAAAAAGCATCT<br>GGCGTTTGATGAACTCTTTGACGTGCGCGC<br>CGTGCGTATCGTTCGTAACGCTCTG                                                                                                                                         | ribonuclease G                                      |                                       |
| 103. | StyR-179 | 61                                                          | ATCGATAACAAAAACGCAAGTCTGACATAA<br>ATGACCGATATGAGCACTGCAATTACACG<br>ACAGATTGCTCCTCGATAACCGAAACCACCG<br>TATGAACCAGATAGGCGCGCACTATGAAG<br>GTCACAAGATTATTGA                                                                                                                                                                                  | probable N-<br>acetylmuramoyl-L-<br>alanine amidase |                                       |
| 104. | StyR-180 | 88                                                          | ATCTGGCGCAAAATGCAGAAAAAGCATCT<br>GGCGTTTGATGAACTCTTTGACGTGCGCGC<br>CGTGCGTATCGTTCGTAACGCTCTG                                                                                                                                                                                                                                             | putative membrane<br>protein                        | Overlap of putative 5'-<br>UTR- 19 nt |
| 105. | StyR-181 | 84                                                          | ATCATAAAGTTACAGAGGTAGTCAATGATTA<br>GAAAAATCGGTGTGTTGACAAGCGGCGGTG<br>ATGCGCCGGCATGAACGCGGNAATCCGC<br>GGCGTTGTGCGCGCAGCGTTGACGGAAGG<br>GCTGGAAGTCATGGGCATTTATGACGGCTA<br>TCTGGGCCTGTATGAAGATCGTATGGTTCA<br>GCTTGACCGTTACAGCGTATCTGACATGAT<br>CAACCGTGGCGGTACTTCTCCTCGGTTCCGC                                                              | GTP<br>pyrophosphokinase                            |                                       |
| 106. | StyR-182 | 133                                                         | ATCATAAAGTTACAGAGGTAGTCAATGATTA<br>GAAAAATCGGTGTGTTGACAAGCGGCGGTG<br>ATGCGCCGGCATGAACGCGGNAATCCGC<br>GGCGTTGTGCGCGCAGCGTTGACGGAAGG<br>GCTGGAAGTCATGGGCATTTATGACGGCTA<br>TCTGGGCCTGTATGAAGATCGTATGGTTCA<br>GCTTGACCGTTACAGCGTATCTGACATGAT<br>CAACCGTGGCGGTACTTCTCCTCGGTTCCGC                                                              | DNA polymerase III<br>epsilon subunit               | Overlap of putative 5'-<br>UTR- 38 nt |
| 107. | StyR-185 | 243                                                         | ATCATAAAGTTACAGAGGTAGTCAATGATTA<br>GAAAAATCGGTGTGTTGACAAGCGGCGGTG<br>ATGCGCCGGCATGAACGCGGNAATCCGC<br>GGCGTTGTGCGCGCAGCGTTGACGGAAGG<br>GCTGGAAGTCATGGGCATTTATGACGGCTA<br>TCTGGGCCTGTATGAAGATCGTATGGTTCA<br>GCTTGACCGTTACAGCGTATCTGACATGAT<br>CAACCGTGGCGGTACTTCTCCTCGGTTCCGC                                                              | 6-phosphofructokinase                               | Overlap of putative 5'-<br>UTR- 12 nt |



|               |     |                                                                                                                                                                                                                                                                    |                                                                             |                                       |
|---------------|-----|--------------------------------------------------------------------------------------------------------------------------------------------------------------------------------------------------------------------------------------------------------------------|-----------------------------------------------------------------------------|---------------------------------------|
| 108. StyR-186 | 224 | CCGTTT<br>CCTGCCCGCTCACTCCTTCAGGTAGCCGCT<br>CATGAGTAAACCGTTCAAACCTGAATTCCGC<br>TTTTAAACCTTCTGGCGATCAGCCGGACGC<br>TATACGTCGTCTGGAAGAGGGGCTGGAGG<br>ACGGGCTGGCGCATCAGACGTTATTGGGC<br>GTGACCGGCTCCGGGAAGACATTACCATC<br>GCCAACGTCATTGCGGACTTGCAGCGGCCA<br>ACGATGGTGCTT | excision nuclease ABC<br>subunit B                                          | Overlap of putative 5'-<br>UTR- 31 nt |
| 109. StyR-188 | 51  | ATTCATCAGGAACACAATATGGCATTACAG<br>TCCGCTGCTGGGTGTCCTCTT                                                                                                                                                                                                            | ribonuclease I precursor                                                    | Overlap of putative 5'-<br>UTR- 7 nt  |
| 110. StyR-189 | 161 | ATTAACCTCAACGCGTGATTCACATGTTGA<br>AGCCGAAGCAAAGATTGACGACGCTAAAG<br>TGCACCTTTTGACTGTAATCCCGTCTTTGCC<br>CTATTACGCTTCACTGGGACTGGCTTATTC<br>AGCAGAGCTCCCGCAATGGACGATTTGA<br>AAGCCGAAGCC                                                                                | conserved hypothetical<br>protein                                           |                                       |
| 111. StyR-190 | 53  | CTTCACCGGTCTGGGCGCGCCGACTGGGA<br>TCCGTATGCCCGCGGCCATT                                                                                                                                                                                                              | glycerol kinase                                                             |                                       |
| 112. StyR-191 | 127 | ACAATACAGGCTAAAGTTGAGCCGCCAGG<br>CTAGACTTAGTTCCACAACACTAAACCTA<br>TAAGTTGGGAAATACAATGTTCCAGCAA<br>GAAGTTACCATTACCGTCCGAACGGTCTG<br>CACACCCGC                                                                                                                       | phosphocarrier protein<br>HPr                                               |                                       |
| 113. StyR-193 | 61  | CTCATCAACGGCCCGCTGCCGCTGCGCCAG<br>ATTTATTTTGGCAGCGCCAGCGGCCAGCG<br>C                                                                                                                                                                                               | putative AraC-family<br>transcriptional regulator                           |                                       |
| 114. StyR-194 | 81  | CTTCCTCTCTACGCCTTTATCAATACCAACT<br>CCACGCTGGACGTTAGCGTTCACGATATGC<br>GCATGGCGCTGTGGTTTTTT                                                                                                                                                                          | lysine decarboxylase                                                        |                                       |
| 115. StyR-197 | 53  | ACAGCTGCGATTCCTGCGCAAGAGAAGA<br>AATTTACGTTGCGGGCTGGCCCT                                                                                                                                                                                                            | conserved hypothetical<br>protein                                           |                                       |
| 116. StyR-200 | 63  | CTTGAAGCGAAGCGCCGTAATAACCCCA<br>GGGCGACGATCTGGCGCCGGGCGTGCTGA<br>AGATC                                                                                                                                                                                             | DNA-directed RNA<br>polymerase, beta-<br>subunit                            |                                       |
| 117. StyR-201 | 105 | CAGCATGTGGGCGTTATTCATGATAAGAAA<br>TGTGAAAAACAAGACCTGTCAATCTGG<br>ATCTACAAACGATTTCGGTCCCCATCACAG<br>CGATAGCGTCCATTCT                                                                                                                                                | succinate<br>dehydrogenase<br>cytochrome b556<br>subunit                    |                                       |
| 118. StyR-203 | 172 | CTAACGACGCCTATCCGACAGGCTTCCGTG<br>TAGCGGTTACGCCTCTATCGTCAAACCTGA<br>TCGATGCCATCAACCAGTTGCGTGAAGGTT<br>TCGAACGTAAGCGGTTGAATTCCAGGAC<br>ATCCTGAAAAATGGGTGCTACCCAGTTGCAG<br>GACGCCGTACCGATGACGCTTGG                                                                   | aspartate ammonia-<br>lyase                                                 |                                       |
| 119. StyR-204 | 52  | CTGCGCGGCTGGGTTATGTGCTGGAGCGC<br>GGCGATGAAGTGGGTTAAGCCG                                                                                                                                                                                                            | putative two-component<br>system sensor kinase<br>transcriptional regulator |                                       |
| 120. StyR-205 | 143 | TTTGGCGCGCTGCTGCTTCCGATATGCG<br>GCGGCTGGCTTGGCGTTGCTTTGCTTAAAG<br>GCAAAGCGCTATTCGCCAGTTTAGCGGAT<br>GATTATGATGTGAATAATTCGCGCTGGT<br>TTTTAAAACGGCGCTACTTTTT                                                                                                          | putative membrane<br>protein                                                | Overlap of putative 3'-<br>UTR- 51 nt |
| 121. StyR-206 | 181 | ATACCGCAAAAGCCTTTAACGAAGCGCTG<br>CCGTTAACCGGTGTGGTGCTGACCAAAGTT<br>GATGGTGATGCGCGTGGCGGTGCGGCGCT<br>CTCTATTCGTCAATCACCGGCAAGCCGAT<br>TAAATTCTCGGTGTCGGCGAGAAAACCG<br>ACGCGCTGGAGCCGTTCCACCCGGATCGTA<br>TCG                                                         | signal recognition<br>particle protein                                      |                                       |
| 122. StyR-208 | 69  | CTTTCGGCACCGTTTCCAGCCCTGCATCG<br>ATACCAGCCAGGTGCCAGGCCAGGCGAC<br>GCTGCCAAGC                                                                                                                                                                                        | serine protease                                                             |                                       |
| 123. StyR-209 | 113 | ATCCTGGCTGATATCGCGTATTCGACAAA<br>GTCGCGTTCACCGCGCTGGTTGAAAAAGCG<br>AAAGCAGCTCTGGCATAAGCCAGTGAAAA<br>GAGGGAGCCTGGCTCCCTCTCTTT                                                                                                                                       | 50S ribosomal subunit<br>protein L20                                        | Overlap of putative 3'-<br>UTR- 35 nt |
| 124. StyR-210 | 61  | ATTAATCCCGTGTGCTGTTAGGTCGTAGT<br>CTGATTATGGGATTTAGTAGCGGCGCGTTG                                                                                                                                                                                                    | ferredoxin-type protein<br>NapH                                             |                                       |

|               |     |                                                                                                                                                                                                                                                                                                                                                                                                                             |                                                                                  |                                       |
|---------------|-----|-----------------------------------------------------------------------------------------------------------------------------------------------------------------------------------------------------------------------------------------------------------------------------------------------------------------------------------------------------------------------------------------------------------------------------|----------------------------------------------------------------------------------|---------------------------------------|
| 125. StyR-211 | 95  | C<br>TCCTGGCGCCGCTGCTGTACCTCCTGCACG<br>CCATTTGACTGGTATCAGCCTGTCGTCG<br>CGACGTTGCTGGGTATCCATGCGGGCTTCT<br>C                                                                                                                                                                                                                                                                                                                  | pts system, N-<br>acetylglucosamine-<br>specific IIABC<br>component              |                                       |
| 126. StyR-212 | 36  | GGTTATCAATATTCCAGGTTGTCCGCAAAA<br>CCC                                                                                                                                                                                                                                                                                                                                                                                       | hydrogenase-2 small<br>chain protein                                             |                                       |
| 127. StyR-213 | 205 | ATAACCATTCTTTTAATGTGCATGTTAACA<br>AAAGAGGTTTAAATGAGAATAAACGTA<br>ACTACTAACCAGTCTGTTAGTAGCTGGACC<br>GGCACTGGCAGGAGAAGCTCACGTTTGTA<br>AATCACAGACGGTAGCGAACTCTGCAGCG<br>AATGCCGAGTTGACGGATAACACGGTATTT<br>AAATGCGGCGAAAGCATTTCCGGA<br>CTTATTCTGTGGAGTTATATATGAGCGAT<br>AAAATTATTCACCTGACTGACGACAGTTTT<br>GACACGGATGTACTCAAAGCGGACGGGGC<br>TATCCTCGTTGATTTCTGGGCAGAGTGGTG<br>CGGGCCGTGTAATAATGATCGCTCCGATTCT<br>GGATGAAATCGCTGA | hypothetical protein                                                             | Overlap of putative 5'-<br>UTR- 42 nt |
| 128. StyR-214 | 164 | ATATTTAGAAAACGCAAATTGCGTTCTTTTC<br>ACTCCCGCAAGGGATTTCAAACAGTGGCAT<br>ACATATGAAAAAACTTTACTCGCAGTCAG<br>CGCAGCGCTGGCGCTCACCTCATCTTTAC<br>TGCTAACGCAGCAGAAAATGATCAGCCGC<br>AGTATTGTCCGACTGGTGGCACCAGAGCG<br>TAAACGTGGTAGGCAGCTACCATA                                                                                                                                                                                           | thioredoxin                                                                      | Overlap of putative 5'-<br>UTR- 9 nt  |
| 129. StyR-217 | 203 | TTTTACGACTGGCCGCTGTTCTGCGCTTTT<br>CCGCAGGTA<br>CTGTTACCGGTGGTTACGCTCAGAGCGACG<br>CGCAGGG                                                                                                                                                                                                                                                                                                                                    | nucleoside-specific<br>channel-forming protein<br>tsx precursor                  |                                       |
| 130. StyR-218 | 100 | CTTCATCAACAGCACCATCCGCGGGCATGA<br>GTGCTGACAGGAA                                                                                                                                                                                                                                                                                                                                                                             | outer membrane protein<br>X precursor                                            |                                       |
| 131. StyR-220 | 43  | CGTCTGTCTCTTATACCGACACGCAAATC<br>AGTCGCTGGGGGGCCAACTTCCACGA<br>AATTCCGATTAACCGCCCTACCTGCCCTA<br>CCATAACTTCCAGCGTGACGGTATGCACCG<br>GATGGATATCGACACCAATCCGGCGAACT<br>ATGAACCAAATCCATTAATGACA<br>ACTGGC<br>CACGCGAAACGCCAGCCGCAAAAACGC<br>GGCGGCTTCGAA                                                                                                                                                                         | site-specific<br>integrase/recombinase                                           | Overlap of putative 3'-<br>UTR- 13 nt |
| 132. StyR-221 | 219 | CCAAACCGAAGCGATGACGACGGTAGATA<br>TCAATACCGCGCGTTTTGTCGGACACNGTA<br>ATCTCGACGACACCATTTTAATACCAATA<br>TTGAAGCGACGAGGCCATTGCCCGCCAG<br>CTACGCCTGCGTAATCTGG                                                                                                                                                                                                                                                                     | catalase HP11                                                                    |                                       |
| 133. StyR-223 | 137 | ACAGAGAATATCAATGAAGAAAATCGTCA<br>CGCTGGTCGCCCTGAGCATATAATGACAG<br>GGTGTGTGA                                                                                                                                                                                                                                                                                                                                                 | ribonuclease G                                                                   |                                       |
| 134. StyR-225 | 68  | ATTTTGAAGAAAGTCAAACGTCATGACG<br>CGCATGAAATATCTGGTGGCAGCAGCCAC<br>GTTGAGCCTGTTTCTGGCGGGTTGCTCGGG<br>TTCAAAGGAAGAGGTGCCCGATAATCCGC<br>CGAATGAAATCTACGCGACTGCTCAGCAA<br>AAGCTGCAGGACGGTAACTGGAA                                                                                                                                                                                                                                | heat shock protein,                                                              | Overlap of putative 5'-<br>UTR- 3 nt  |
| 135. StyR-226 | 169 | CTTAACGAGAAGCTTAGCTGATGACGCTAT<br>AATTAGCGCATAAACACCTGGCGCTGTTGC<br>AGGTGAGGAGGAACAATGAAAATTA<br>CTGT<br>ACTGGGATGCGGAGCCTTAGGACA<br>ACTTTG<br>GCTTTGCGCACTGTGCAAAATGACATGA<br>CGTACAGGGCTGGCTACGGGTGCCACAAC<br>CTTAT                                                                                                                                                                                                       | putative lipoprotein                                                             | Overlap of putative 5'-<br>UTR- 8 nt  |
| 136. StyR-227 | 183 | CGCTAAACGAGACAAAAGAAAACGGCATT<br>CGCCTGACCGAACGTAAAGAGACGTTAGG<br>CGATGTGA                                                                                                                                                                                                                                                                                                                                                  | 4-methyl-5(b-<br>hydroxyethyl)-thiazole<br>monophosphate<br>biosynthesis protein | Overlap of putative 5'-<br>UTR- 75 nt |
| 137. StyR-230 | 66  | ATTCCATGGTAAAAGTCGGCGTTTACCAG<br>AAGTGAACCGCTGGCGACCGTTTTATTGG<br>TGCTGTCTCTGGTAATGGTCATTGCCAGCC                                                                                                                                                                                                                                                                                                                            | signal peptidase I                                                               |                                       |
| 138. StyR-231 | 135 |                                                                                                                                                                                                                                                                                                                                                                                                                             | spermidine/putrescine<br>transport system<br>permease protein PotC               |                                       |

|               |     |                                                                                                                                                                                                                                                                                                               |                                                       |                                       |
|---------------|-----|---------------------------------------------------------------------------------------------------------------------------------------------------------------------------------------------------------------------------------------------------------------------------------------------------------------|-------------------------------------------------------|---------------------------------------|
| 139. StyR-233 | 226 | AGTTATTGCTCGTGATAAAACCAAGGGCC<br>GATAAGGCCCGTAAT<br>CTATCGTGTGATGTATATCGCATCATCAAT<br>TTAAAGTCAGGTGGGATGCCTGTCTGTAA<br>CGCCCCTTTGGGATTGGGGGTTCTGCTGA<br>GCATCTATGAAGCTGAATAAACTTATATA<br>AATATCAGAGATAAATGGTGGGACTACC<br>GCTCATTCTCCCTTCGATTTACTACCTGTT<br>TTAAGTAGCGCAAATACTTATGCGCTTACC<br>AGCACTGGAAATGTGG | putative membrane<br>protein                          |                                       |
| 140. StyR-235 | 95  | TTCCCTTCCCTAAATCTCCATTATGATTATT<br>GAAAAAAGGTTAAAACTATACCGTCTTT<br>GTCAAAAAAGACGGTGAAAAATATATT                                                                                                                                                                                                                | lipopolysaccharide core<br>biosynthesis protein,      |                                       |
| 141. StyR-236 | 112 | TTTTTAACGCTTACAGGACGATGAAAAAGAA<br>AAGACCCGTACTTCAGGATGTAGCCGACC<br>GCGTGGCGTGACCAAAATGACGGTCAGC<br>CGCTTTTTGCGTAAACCCGGA                                                                                                                                                                                     | gluconate utilization<br>operon repressor             | Overlap 5'-UTR- 10 nt                 |
| 142. StyR-237 | 213 | TTTGCTATGGTCAAAATCGTCGCCATCGTG<br>GCGTTGATGTGGTTGGGTTGGTGTGATT<br>GCGATGCACTTTAAATCGCCGACCGGCGTT<br>GAAGCGTCTTTCGCGCATCTGTGGAATGAC<br>GGCGGCTGGTCCCGAAAGGTATTAGCGG<br>GTTCTTGCCGGTTCCAGATTGCGGTGTTT<br>GCCTTCGTGGGCATTGAGCTGGTCCGGTACT<br>ACC                                                                 | D-serine/D-<br>alanine/glycine<br>transporter         |                                       |
| 143. StyR-238 | 144 | ATGTAATTGTGCGGAGAACGAAAAATGAAC<br>TTTGGAGAGCGTTTACAAAGAGTGCTTAA<br>GAGACTGGGATCACCAATCTGAGTTAGGT<br>CGTAGAGTCGCGCTACCTCTCAATCAGTT<br>AATGGTTGGTGTCAAGTCCGGCATTTC                                                                                                                                              | putative DNA-binding<br>protein,                      | Overlap of putative 5'-<br>UTR- 23 nt |
| 144. StyR-240 | 92  | ATGCACGAGAATCAACAACCACAAACCGA<br>GGCTTTTGTAGCTGAGTGGCGCAGAGCGTG<br>AAGCGATAGAGCACGAGAAGCACCCTAC<br>GAAGA                                                                                                                                                                                                      | NADH dehydrogenase I<br>chain E,                      |                                       |
| 145. StyR-242 | 123 | CTGTAAAGATGAGCAGGGCCGTTACGTGT<br>CGGCGCGGGCGTCCGGCGCAGGCGGGCA<br>ACGAAGAGCGCGTTGACGCGCTGGTGGCG<br>GCAGGCGTTGACGTCTGTGATCGACTCT<br>TCTCA                                                                                                                                                                       | inosine-5'-<br>monophosphate<br>dehydrogenase         |                                       |
| 146. StyR-244 | 237 | CTAAACCGCTGACGGAGTCATCAATCCCGT<br>CGGAAGCACTGGCAGCGGTTCCCTCATGAG<br>CTTCCGGTAGCGACGGCCGATGAAGAAAG<br>CCAACAGTTGCTGTTAAGCGGCATGAGCTG<br>CGCCAGTTGTGTACCCGCGTACAACATGC<br>GCTACAAAGCGTACCGGGCGTACGCAGG<br>CACGGGTAAACCTGGCGGAACGCACTGCG<br>CTGGTGTGAGGCGAGCGCTCCGCCGCTGA                                        | copper-transporting<br>ATPase                         |                                       |
| 147. StyR-245 | 236 | CTCCGATTCAACGTAGAAAATCGACACGTA<br>TTTACGTTGGGAATGTGCCGATTGGCGATG<br>GCGCCCCTATCGCCGTCCAGTCGATGACTA<br>ACACGCGTACCACTGACGTGGAAGCGACG<br>GTTAATCAGATCAAAGCGCTGGAGCGCGTT<br>GGCGCAGATATGTTCTGTGTTCTGTACCG<br>ACCATGGACGCCCGCAAGCGTTCAAGCTT<br>ATCAAACAGCAGGTTAGCGTCCCCTG                                         | GcpE protein                                          |                                       |
| 148. StyR-246 | 144 | ACACTCCTTCGGTAAAAGAGGAGCGTTTTTC<br>GCGCGTTTCTCGGTGTGCCGATCATTACAG<br>GTCCGCAACTTCTCGGCGTGTGGTCTGTC<br>AGCAGCGCAATTGCGCCAGTACGATGAA<br>AGCGAAGAGTCTTTCCTCGTACCGC                                                                                                                                               | phosphoenolpyruvate-<br>protein<br>phosphotransferase |                                       |
| 149. StyR-247 | 154 | CATACTTCCAGCGTCATGACTTTATCGCCA<br>ATGGCGGAAAACCTCAAGCCGCAGGAAAAC<br>CCGAACGCGCAAGCGATTACAGACGAACT<br>CAAAGAGATCGACTCGGAATAAACGGCAG<br>TAAATAAAAAGGTGAGCGCAATGCTCACC<br>TTTTTGAT                                                                                                                               | VacJ lipoprotein<br>precursor                         | Overlap of putative 3'-<br>UTR- 44 nt |
| 150. StyR-249 | 291 | TTAATTAAGGCTCCGTCATATGGAGCCTTTT<br>TACTCGGTCAGAGGACCGTATGAAACGA<br>ATTTTCCTTACCTGCGCGGCGTTGTTGTTCA<br>GCAGTCAGGCGTTGGCCGATGAGTGTGCC                                                                                                                                                                           | putative secreted protein                             | Overlap of putative 5'-<br>UTR- 50 nt |

|               |     |                                                                                                                                                                                                                                                                                                                                                                                                |                                                                  |                                       |
|---------------|-----|------------------------------------------------------------------------------------------------------------------------------------------------------------------------------------------------------------------------------------------------------------------------------------------------------------------------------------------------------------------------------------------------|------------------------------------------------------------------|---------------------------------------|
| 151. StyR-251 | 133 | AGCGCCAGTACGCAGCTGGAAATGAATCG<br>CTGCGCCGCCGCAATACCAGGCGGCAG<br>ATAAAAAGCTGAACGAAACCTATCAAAGC<br>GCGATTAAGCGTGCGCAACCGCCGAGCG<br>TGAGCTATTGCAAAAAGCGCAGGTGGCAT<br>GGATTGCCCTGCGCGACGCCGATTGCG<br>CCTGGCGCCGCTGGCTAAAGTTATCAACGA<br>CAACTTCGGCATCATCGAAGGTCTGATGAC<br>TACTGTTCACGCGACTACCGCAACCCAGAA<br>AACCGTTACGGCCCGTCTCACAAGACTG<br>GCGCGCGGCCGC                                            | glyceraldehyde 3-<br>phosphate<br>dehydrogenase A                |                                       |
| 152. StyR-253 | 173 | ATTAAGCAAACAAGCGCGTGAAAACC<br>GACGGATTCTGGTCGCTTTCTTTGCCAG<br>AGAAACGAACTCTACGTACCTAAGATGC<br>TGGCATTGAGTGAAATTCTAAAAACAGC<br>AAACGCTACGGCGTACGTCTGCCAACAA<br>AGATGAAAGCCGAGCGCTGGCACGAGT<br>CCTCTTTGCTCCTGCTATGCTTGAAGAGTG<br>ACGGGTATAACAGGAGCGGAGTCATGCAA<br>TACAACACGTTAGGAAAATACCGATCTTCGG<br>GTGTCCCGCCTTTGTCTGGGCTGTATGACA<br>TTCGGCGAGCCGAGTCGCGGCAATCACGC<br>CTGGACGCTTCCCGAAGAGAGCAG | membrane-bound lytic<br>murein transglycosylase<br>d precursor   |                                       |
| 153. StyR-257 | 172 | AAAATGGCAGCTGCTGTACGACGCGCTGTC<br>GCCAATAGCGACAAAACCTGCGACATGATCA<br>TCATGCCCGCCTGTTTCGGGCTGGCGAACG<br>ATACGCTGTGGCGCTGGCTAACGAACGTC<br>TGCCCTGCGCGCTCACGCTGCTGCCGACG<br>CTTGGCCGCGGCCTGGTGGCGTAAAACG<br>ATCTGGTTTTTTTTGATAACGGTCCGAAA<br>TGCCATTAGTCATCAGCATGATACCGGATG<br>ATATTACCTTTACCGGGATTGCTACTCGC<br>ATCGGGTATTTATCGCGCTGAATGAAAAGC<br>CTAATGCCACAGCGATTCTGTGCGGCGGCA<br>CCT           | putative oxidoreductase                                          | Overlap of putative 5'-<br>UTR- 57 nt |
| 154. StyR-258 | 150 | GTCATGCAGGCCAGAAACATTCTTATGTG<br>AAAATCACCGCCAGCCGCTACGAAAAGG<br>AATGTTGAAAGCGGTACG                                                                                                                                                                                                                                                                                                            | anaerobic glycerol-3-<br>phosphate<br>dehydrogenase subunit<br>B |                                       |
| 155. StyR-260 | 186 | TAATTGCGCTGTTACAGCCCTGGAAAGGGT<br>TTGCTGTATTACAGTGAACGTATCGTCGCC<br>GT                                                                                                                                                                                                                                                                                                                         | putative DeoR-family<br>transcriptional regulator                |                                       |
| 156. StyR-261 | 79  | TTTTTCCACCCGAAAAGGCAACGAATACCA<br>TGGAATACGCGTTTTTCGCCAGGAAGATT<br>TCGAAGAGGTGATTACCCTCTGGGAGCGTT<br>GCGACCTGCTGCGTCCATGGAACGATCCTG<br>AAATGGATATTGAACGCAAGGTGAATCAC<br>GATGT                                                                                                                                                                                                                  | tRNA hydroxylase                                                 |                                       |
| 157. StyR-263 | 62  | ATGCCCCGATCCCGACGTACCGGAAGCGC<br>GTGTGATCTTGCCAAAACCTGGTAAAAGCGC<br>GCGAAGCGCAAGGTCA                                                                                                                                                                                                                                                                                                           | putative exported<br>protein                                     |                                       |
| 158. StyR-265 | 154 | CTTAACCCGGCGGATGCGAAGTTGGGC<br>GTCAATGCCGGGACTCGCGTCTTCTTTAGC                                                                                                                                                                                                                                                                                                                                  | putative<br>acetyltransferase,                                   | Overlap of putative 5'-<br>UTR- 29 nt |
| 159. StyR-266 | 75  | ATCATGGACCTCGCCCGTTTTCCGACGCT<br>CTCGACGCAGGAAACCGGACGCTTTA<br>CTTCTCGTCAGATATCGAACTGAAGGCGG<br>TCTGGTTACCTGGCGCTGGCGTTAACCC<br>ATCGCATCTGAAAATTGTGAGCCCGGTGGT<br>GATGGGCTCCGTGCGCGCCCGTCTGGACCG<br>ACTGGA                                                                                                                                                                                     | biosynthetic arginine<br>decarboxylase                           |                                       |
| 160. StyR-267 | 60  | ATTGAACGCGGCTGATCAAAGAAGTCGA<br>TCAGCAGGCCTTACCGGAGGCCCGCG<br>CTA                                                                                                                                                                                                                                                                                                                              | NADH dehydrogenase I<br>chain G                                  |                                       |
| 161. StyR-268 | 56  | ATGGTGTGGGCGCTGGTCATTATTCACGGT<br>AGCGCGTTGGCGCCGCATCTGAAAATTGTC<br>AGTTACGTGTTGACGGGGATCGTGGCATT<br>CTGATGTGATCCAGGCAAAGCAGCTATTG<br>CTTCTTTTGTTCGGGAACATTTATCGGCG<br>CCTGCGCGACA                                                                                                                                                                                                             | alpha-amylase                                                    |                                       |
| 162. StyR-269 | 126 | ATTGAAACGAATATCGTTGGTACTTACACC                                                                                                                                                                                                                                                                                                                                                                 | 2-oxoglutarate<br>dehydrogenase E1<br>component                  |                                       |
| 163. StyR-270 | 62  | ATGGTGTGGGCGCTGGTCATTATTCACGGT<br>AGCGCGTTGGCGCCGCATCTGAAAATTGTC<br>AGTTACGTGTTGACGGGGATCGTGGCATT<br>CTGATGTGATCCAGGCAAAGCAGCTATTG<br>CTTCTTTTGTTCGGGAACATTTATCGGCG<br>CCTGCGCGACA                                                                                                                                                                                                             | N-acetylglucosamine<br>repressor                                 |                                       |
| 164. StyR-271 | 162 | ATTGAAACGAATATCGTTGGTACTTACACC                                                                                                                                                                                                                                                                                                                                                                 | putative membrane<br>protein                                     |                                       |
| 165. StyR-274 | 95  |                                                                                                                                                                                                                                                                                                                                                                                                | UDP-N-                                                           |                                       |

|               |     |                                                                                                                                                                                                              |                                                                                    |                                                              |
|---------------|-----|--------------------------------------------------------------------------------------------------------------------------------------------------------------------------------------------------------------|------------------------------------------------------------------------------------|--------------------------------------------------------------|
|               |     | TTGCTGGAAGCCGCTCGCGCTTACTGGTCC<br>GCGCTTGACGCGGACGCTAAAGCGGCGTT<br>CCGCTT                                                                                                                                    | acetylglucosamine<br>epimerase (UDP-<br>GlcNAc-2-epimerase)                        |                                                              |
| 166. StyR-276 | 26  | CTCCCAAACCTCTGTCGTTGCCGCGTC                                                                                                                                                                                  | menaquinone<br>biosynthesis protein                                                |                                                              |
| 167. StyR-278 | 142 | GTTTTCCCGTTCTTTAACATCCAGTGAGAG<br>AGACCGATGCATCCGATGCTGACCATCGCC<br>GTGCGCGCAGCGCGCAAGGCGGGTAATGT<br>AATTGCCAAAACTATGAAACTCCGGACG<br>CTGCAGAAGCGAGCCAAAAAGG                                                  | extragenic suppressor<br>protein SuhB                                              |                                                              |
| 168. StyR-279 | 85  | ATAGCGATGTGGTGGCGGAGGCGTTAAC<br>GCATATAACGCGACCAAATGACGCAGAAC<br>CCGGCGCAGGTTAGCCTGCGCCCAAAT                                                                                                                 | mannitol operon<br>repressor (mannitol<br>repressor protein)                       | 5' and 3' overlap with<br>two putative ORFs,<br>respectively |
| 169. StyR-283 | 103 | ATATTCGTAAAGATCGTTCGTAACGAGGAA<br>GTGGGTGACACCGGGCGTTATAACTTCGGT<br>CAGAAATGCGTATTCTGGGCGGCGATTATC<br>TTCTGGTGCTGCT                                                                                          | mannitol-1-phosphate<br>dehydrogenase<br>formate dehydrogenase-<br>O gamma subunit |                                                              |
| 170. StyR-284 | 186 | ATCTTAAACCCATTGTCTGGGAACTGGTCA<br>TCAACCCTGACCAGAACGAAATGGCGCGC<br>GACTGGCAGCTTATGTTATTAGCGTGCCA<br>GTTATCTTATTGATTGAGATGCTATTTGCG<br>ACATGGAGTTGGCAAAAGCTGCGCAGTCT<br>CACGCGCCGCCCATTTGCAAGGCCGCT<br>TGCGGC | putative sulphatase                                                                |                                                              |
| 171. StyR-286 | 63  | GTCAGACTCACGGTTAAGTATGCCAACCAG<br>ATGGCCTGGTGATGGCGGGATCGTTGTATA<br>TTT                                                                                                                                      | conserved hypothetical<br>protein,                                                 | Overlap of putative 3'-<br>UTR- 21 nt                        |
| 172. StyR-289 | 26  | TCACGAACCCCGCGGTTGCAGTTG                                                                                                                                                                                     | DNA polymerase III<br>subunits gamma and tau                                       |                                                              |
| 173. StyR-294 | 73  | TTAACAGCGATAAAGCCTACTGGAACAAC<br>TTAAAGACCCCTTTTAAAGCTCGAATTTAC<br>CATCAGGGGATGTA                                                                                                                            | periplasmic glucans<br>biosynthesis protein<br>MdoG precursor                      |                                                              |
| 174. StyR-297 | 55  | TTTGCAGACTCAACTGGAGGCGCTGCCTTT<br>TCATCCTCAGCCTGACCTGACTTA                                                                                                                                                   | para-aminobenzoate<br>synthase component I                                         |                                                              |
| 175. StyR-298 | 160 | ATATTACGCTGGAGAAAGGCGAATCGCTT<br>AACTTCCAGCTTCACGGGCGCGCCTAT<br>TTGCAGTCGATTCACGGTACGTTCCACGCG<br>ATGACGCACAACGAAGAACGCGAGGCGTT<br>AACCTGCGGAGATGGCGCATTTATTCGTGA<br>TGAACCTAACAT                            | conserved hypothetical<br>protein                                                  |                                                              |
| 176. StyR-299 | 73  | TTTATGGACCGCGTGGTAGGCTATATGGTC<br>TCGCCGTGCTGTGGAAAAAGATCGCCCGT<br>GGTTTGTGCGGACG                                                                                                                            | DNA topoisomerase I,<br>omega protein I                                            |                                                              |
| 177. StyR-300 | 82  | TTACGAAGCGGAACTCAAATACTTGGTGG<br>ATCACGAATGGGTGCGCCGACTGAAGAC<br>GCTATCTGGCGTTCGACCAAAGAA                                                                                                                    | aerobic glycerol-3-<br>phosphate<br>dehydrogenase                                  |                                                              |
| 178. StyR-301 | 79  | ATGACTGAACTGCGTAAAGCAGGTCGTGA<br>AGCTGGCGTATACATGCGTGTGTTTCGTAA<br>CACCTGCTGCGCCGCGTCCG                                                                                                                      | 50S ribosomal subunit<br>protein L10                                               |                                                              |
| 179. StyR-303 | 48  | ACTGCAAAAATGGTGTCTCAAAGAGCAGCGT<br>TTTCACTCGATCATGGACA                                                                                                                                                       | guanosine-3',5'-<br>bis(diphosphate) 3'-<br>pyrophosphohydrolase                   |                                                              |
| 180. StyR-304 | 45  | ACCATGGTACGTGATTGGCAGTACCGACG<br>ATAATCCGGACATCAC                                                                                                                                                            | detergent-resistant<br>phospholipase A                                             |                                                              |
| 181. StyR-307 | 132 | ATTTCCGCCACTGATAGGTAACCGTATTTA<br>CGGCTGCGATGACTGCCAGCTTATCTGTCC<br>GTGGAATCGTTACTCTCAGTTGACCGACGA<br>AGCAGATTTAGCCACGCAAGGCGCTGC<br>ATAACCCAGATTT                                                           | putative 4Fe-4S binding<br>protein                                                 |                                                              |
| 182. StyR-308 | 175 | ATGCATAACGATAAAGATCTCTCTACGTGG                                                                                                                                                                               | probable transport ATP-                                                            |                                                              |

|               |     |                                                                                                                                                                                                                                                                                                                                                                                                                                                  |                                                                  |                                   |
|---------------|-----|--------------------------------------------------------------------------------------------------------------------------------------------------------------------------------------------------------------------------------------------------------------------------------------------------------------------------------------------------------------------------------------------------------------------------------------------------|------------------------------------------------------------------|-----------------------------------|
|               |     | CAGACCTTCCGCCACTGTGGCCAACCATA<br>GCGCCTTTTAAAGCAGGCTCGATCGTGGCG<br>GGCATAGCGTTAATTCTCAACGCAGCCAGC<br>GATACCTTCATGCTATCGCTCCTCAAGCCA<br>TACTGGATGATGGTTTCGGTAAAA<br>ATATTGAGGCAAGTCACCATCCCCGTTAATT<br>CAGAGTAAAAGTATGTTTTGTGTGATCTAT<br>AGAAGTAGCAAGCGCGATCAAACCTATTT<br>GTAT                                                                                                                                                                    | binding protein MsbA                                             |                                   |
| 183. StyR-310 | 93  |                                                                                                                                                                                                                                                                                                                                                                                                                                                  | conserved hypothetical protein                                   | Overlap of putative 5'-UTR- 3 nt  |
| 184. StyR-311 | 105 | ATCTCAACTTCCGCCGGTTCGCGCCCGGCT<br>GGTGTGTTAGCCGCCCCACCTGGTCAAAC<br>TGGTGAAACGCTTTTTCAACGCGAAAGCT<br>TTGCCGCACCGAAG                                                                                                                                                                                                                                                                                                                               | putative glutathione transferase                                 |                                   |
| 185. StyR-313 | 111 | GTATTACCGAGCCTATCGAGTTCTCCTTCA<br>TGTTCTGGCGCCGATCCTGTACATTATTC<br>ACGCGATTCTGGCAGGTCTGGCATTCCCGA<br>TCTGTATCCTGCTGGGGATGC                                                                                                                                                                                                                                                                                                                       | PTS system, glucose-specific IIBC component                      |                                   |
| 186. StyR-318 | 82  | ATGATCATGTGGCGCTGGCGGGATGCGAT<br>AACAAACGATAAAACCGCCCCGACGACTAA<br>AAGCGAAGCGCCAGCCGTAGCGT                                                                                                                                                                                                                                                                                                                                                       | putative lipoprotein                                             |                                   |
| 187. StyR-319 | 80  | ATGAAGATTGCCGGCTTGCTGACGCTGGTC<br>GCCGGCATCGTATTGATCAAATCAGGGAC<br>GCGTAAACCGGCAAACCGGT                                                                                                                                                                                                                                                                                                                                                          | putative conserved membrane protein                              |                                   |
| 188. StyR-320 | 59  | ACCGAAGCCTGGCGACCGTGTAGAGCCGG<br>ATATGATGCCTGCCGCAACGCAGGCGCTG<br>CTACGGCACGCTGATTAGCGAACTCAAAG<br>CCCGTAAAGGTGATTGTCAGCGTCGCCCGG<br>A                                                                                                                                                                                                                                                                                                           | DedD protein                                                     |                                   |
| 189. StyR-321 | 60  | CTACGGCACGCTGATTAGCGAACTCAAAG<br>CCCGTAAAGGTGATTGTCAGCGTCGCCCGG<br>A                                                                                                                                                                                                                                                                                                                                                                             | glycine dehydrogenase (decarboxylating)                          |                                   |
| 190. StyR-324 | 26  | TCAATCTGCTCACGGCGCATGACGG                                                                                                                                                                                                                                                                                                                                                                                                                        | glycogen operon protein                                          |                                   |
| 191. StyR-325 | 52  | AGTCTCATACCCGATCAAACGCCTGAAC<br>TTCTGGTTTTACCTGTTACTCA                                                                                                                                                                                                                                                                                                                                                                                           | periplasmic divalent cation tolerance protein CutA               |                                   |
| 192. StyR-326 | 49  | TGCATGAACCACGTACGCCGAGGATAAA<br>GACACCATGTTGCCTTCTC                                                                                                                                                                                                                                                                                                                                                                                              | NADH dehydrogenase I chain G                                     |                                   |
| 193. StyR-332 | 85  | TGATGGCTATCATGTCCAAGTATTGCCA<br>TAAATACTACCCTGGCCGTTGGCGACTACG<br>CCTCCAGTGAACATGATGGCCCAAG                                                                                                                                                                                                                                                                                                                                                      | putative fimbrial protein                                        |                                   |
| 194. StyR-334 | 95  | ATCAACGACTCANGATGAGGGTCAGGATC<br>GCCAGGAGGCGAAGACACAGGATTGTCAG<br>GAAGACAAACGTCGGGAGACGTTAGTAAA<br>AGGAAATG                                                                                                                                                                                                                                                                                                                                      | hypothetical protein                                             |                                   |
| 195. StyR-337 | 175 | CCAATCTTTTGTATGTCTGATCGTTTCCATT<br>TGAGTATCCTGAAAACGGGCTTTTCAGCAT<br>GGTACGTACATATTAATAGTAGGAGTGC<br>ATAGTGGCCCGTATAGCAGGCATTAACATT<br>CCTGATCAGAAAACGCCGTGATCGCGTTA<br>ACTTCGATCTACGGTGTGCGCAAGA                                                                                                                                                                                                                                                | 30S ribosomal subunit protein S13                                | Overlap of putative 5'-UTR- 93 nt |
| 196. StyR-338 | 59  | CTTGCAACCCAGCAATCTCACATTCCCGCT<br>AAGGCGGTTGAAGACGCGGTAAGAGAT<br>TTCAGATTGCCGAATATTTTCGTACGCCGT<br>TGCC                                                                                                                                                                                                                                                                                                                                          | integration host factor beta-subunit (IHF-beta)                  |                                   |
| 197. StyR-339 | 34  |                                                                                                                                                                                                                                                                                                                                                                                                                                                  | motility protein B                                               |                                   |
| 198. StyR-340 | 203 | ATTGAAACCAACGTAGACGCCACCAGCAC<br>GCTGTTGAGCGAGGACCATCCGCGCAGG<br>AAAAACTCAAAGAAGTACGTGAAGATGAC<br>GATGATGCGGAGATGACCCACTCGGTAGC<br>GGTAAATATTTATCCTGCCACGACGCGGAT<br>GCCGCAGTTAACCATCGTGGTGGTTCGATAC<br>CATTCCGATAGAGCTAAAACGCTCCTA<br>ATCAGCGACGGTACGGTACTGGCCAGCCAG<br>GTACGAACGACGCGGTTGCCGAAAGTAA<br>CGCACGCGAAATTAATCTCGCGCCGGTCAA<br>TAAACTGATCGACGACATCGTACAGGCTA<br>ACGCGGGTAAATCCTGAGGTGCGTGTGATG<br>CAACAGCAAAAACCGCTGGAAGGCGCGCA<br>G | sensor protein PhoQ, regulator of virulence determinants         |                                   |
| 199. StyR-342 | 177 |                                                                                                                                                                                                                                                                                                                                                                                                                                                  | multidrug resistance protein A<br>multidrug resistance protein B |                                   |
| 200. StyR-343 | 122 | CTGCGTAAGCTGAACATGGGGCCAGAGTT<br>CTTGTCGGCGTTTACCGTAGGCGACCAGTT                                                                                                                                                                                                                                                                                                                                                                                  | aspartate-semialdehyde dehydrogenase                             | Overlap of putative 3'-           |

|               |     |                                                                                                                                                                                                                                                                                                                                                                                                                                             |                                               |                                       |
|---------------|-----|---------------------------------------------------------------------------------------------------------------------------------------------------------------------------------------------------------------------------------------------------------------------------------------------------------------------------------------------------------------------------------------------------------------------------------------------|-----------------------------------------------|---------------------------------------|
|               |     | GTTATGGGGCGCCGCCGAGCCGCTGCGTCA<br>AATGCTGCGCCAGTTGGCGTAGTGGCTATT<br>GCA                                                                                                                                                                                                                                                                                                                                                                     |                                               | UTR- 11 nt                            |
| 201. StyR-344 | 122 | ATTAGCCCCGGCAATACAGAAGGCCGATA<br>GCTGCTGCTGCGAAGAACATTGCGCGTCCA<br>GCGCGCCTGTTTCTACTGCCGTGGCAGGCA<br>CGCGCTATACCTGAAAAATCTCCGGCATGG<br>ACT                                                                                                                                                                                                                                                                                                  | heavy metal-<br>transporting ATPase           |                                       |
| 202. StyR-345 | 191 | CCTCCGAAAACCTACACCAGCCCGCGCGTG<br>ATGCAGGCCGAGGGGTCTCAGCTGACCAA<br>CAAATACGCTGAAGGATATCCGGGCAAGC<br>GCTACTACGGCGGTTGCGAATACGTTGATG<br>TCGTAGAGCAGCTGGCTATCGACCGCGCG<br>AAAGAAGTTCGGCGCCGACTACGCTAA<br>CGTGCAGCCGCACTCC                                                                                                                                                                                                                      | Serine<br>hydroxymethyltransferase            |                                       |
| 203. StyR-346 | 191 | ATTATGCCAGGCATGAGGAGAATAGAATG<br>AAGCAACAGACCAACCGAAATCGTCGTTG<br>GGTTTTGGCTCGCGTCCCCACGGCGCGCC<br>GCAGATGGATAACTTCCGCTCGAAGAAG<br>ATGACGTCGCGACGCCCGGTGAAGGGCAG<br>GTGCTATTGCGTACCGTTTTTTTATCACTCG<br>ACCCTTATATGCGT                                                                                                                                                                                                                       | Putative NADP-<br>dependent<br>oxidoreductase |                                       |
| 204. StyR-347 | 138 | TTATGAAAAAATTGTCAGGCGTTTTTCCTTC<br>TGCTGTTGGTTGTGCTGGGTATTGCCACGG<br>GCGTGGGGATGTGGAAAGTTCGCCATCTG<br>GCGAACAGCACGTTACTTATTAACAAACGA<br>GACTATCTTACGCTCAAGG                                                                                                                                                                                                                                                                                 | Putative secreted protein                     | Overlap of putative 5'-<br>UTR- 2 nt  |
| 205. StyR-348 | 93  | ATTTTCGGTTTGTAACTATTGTGCCATTTT<br>TCTGGGCATGCTGGCGCTGCGCGCCTGGC<br>ACTATGACGAGAATCATTACAGTGGCGCA<br>ATA                                                                                                                                                                                                                                                                                                                                     | Phosphatidate<br>cytidyltransferase           |                                       |
| 206. StyR-349 | 149 | ATTAACAAACATGAGAACCATACGACGC<br>CATGAGCGACGACAATTCACACAGTAGTG<br>ACACAGTAAACAGTAAAAAGGGATTTTTTT<br>CCCTGCTACTCAGCCAGCTTTTCCACGGTG<br>AACCTAAAAACCGTGATGAGTTGCTG                                                                                                                                                                                                                                                                             | Haemolysin-related<br>protein,                | Overlap of putative 5'-<br>UTR- 12 nt |
| 207. StyR-350 | 253 | TTGATGGAACCAGAGGAAAGCATGATGGG<br>TATGAAAAGAGACAGTTAGCAATATTGTGA<br>CCAGCCAGGCAGAGAAAGGAGGCGTTAAA<br>CACGTCTATTACGTGGCGTGCGGCGGTTCT<br>TATGCGGCGTTCTATCCGGCGAAAGCATTT<br>TTAGAAAAAGAAGCGAAAGCGTTGACTGT<br>CGGTCTGTATAACAGCGGAGAATTTATTA<br>CAACCCGCCGCTAGCGCTGGGAGAAAATG<br>CCGTTGTGGTTGTGCGCT                                                                                                                                               | Putative phosphosugar-<br>binding protein     | Overlap of putative 5'-<br>UTR- 14 nt |
| 208. StyR-351 | 184 | AGTTGAAATCGTTGGTATCAAAGAGACTCA<br>GAAGTCTACCTGTACTGGCGTTGAAATGTT<br>CCGCAAACCTGCTGGACGAAGGCCGTGCCG<br>GTGAGAACGTAGGTGTTCTGCTGCGTGGTA<br>TCAAACGTGAAGAAATCGAACGTGGTCAG<br>GTACTGGCTAAGCCGGGCACCATCAAGCC<br>GCACAC                                                                                                                                                                                                                            | EF-Tu                                         |                                       |
| 209. StyR-352 | 131 | ATTTCTCAAGGAGAAGGGTTATCCATGCAA<br>AATATCGTCATTATCGTAACGGCGCCGCC<br>TACGGCAGCGAATCATTATTTAATAGCCTG<br>CGTCTGGCCATTGCGCTTCGCGAGCAGGAA<br>AGCCATCTCGA                                                                                                                                                                                                                                                                                          | conserved hypothetical<br>protein             | Overlap of putative 5'-<br>UTR- 24 nt |
| 210. StyR-353 | 386 | CGGCTAAGTTACAAGATGCTACTCAGACCT<br>CCGAAAAAGACATGATGAATCTGATGGAC<br>GTGATCCAGAAAGGATTCTACGGGGGGT<br>AGATTCAGGAAATATGCTGCAGGGTTTCTC<br>AAAAATCAGCAGCGGATGAATATCATCA<br>ATAAGAAGGGGTTGGAAGCGGTCAAACCT<br>TTCGCGCCTTTGTTGGTTATGGCTGATCAG<br>GGGAGTATGGCTGGTGAGTCTGCCGTAAT<br>GCATACCGAAAGATTTTCAGGCCGCTCTG<br>GATGCTGACAATATTAAGGCGGTTAACGAT<br>GACCTGAAAGAAAAGGGCGCGGGTATTA<br>ATTCAACTTCTCTGACGGGAAGGGTGGGTT<br>TGGTGGTCTGGAAAATATGTATGCCAGCT | Hypothetical protein                          |                                       |

|               |     |                                                                                                                                                                                                                                                                |                                               |                                       |
|---------------|-----|----------------------------------------------------------------------------------------------------------------------------------------------------------------------------------------------------------------------------------------------------------------|-----------------------------------------------|---------------------------------------|
| 211. StyR-355 | 177 | G<br>ATTCAGTCCCAGCGTGTGAAAGCAGACCAG<br>GGGTTTCGACGGCCTGTACAACGAATTACTG<br>CTGGAAATGGCGCGTAATCAAATCTTTCTG<br>ATCAACGAGCGTCAGCTCTCGGTGAGCCA<br>ACAAAGCTGGTTGCGCCACTATTTAAGCA<br>CTATTTGCGCCAGCATATTACCCCGATT                                                     | polyphosphate kinase                          |                                       |
| 212. StyR-356 | 95  | AATATTTATTAACCTCCCAGGTGAGATATT<br>GCCCATGTACTCGTATCGCTAAAGAAGCCCT<br>GACGTTTGACGACGCTCCTTGTTCCTGC<br>TCACT                                                                                                                                                     | inosine-5'-<br>monophosphate<br>dehydrogenase | Overlap of putative 5'-<br>UTR- 28 nt |
| 213. StyR-357 | 79  | ATATTGATAACAAACCGCGTTGACGAAG<br>TAATTTTGTGATACCGCTGATGAGGTTAC<br>GTTTCATCAGGCTGCAAACC                                                                                                                                                                          | smpA (small membrane<br>protein A)            | Overlap of putative 3'-<br>UTR- 47 nt |
| 214. StyR-359 | 47  | CTTTCTCACTGGTCAACTGTCGACACA<br>ATGCCCGTTTTGCTTT                                                                                                                                                                                                                | putative membrane<br>protein                  | Overlap of putative 5'-<br>UTR- 30 nt |
| 215. StyR-365 | 158 | ATCAAACGACATTTGCCAAAAGGCGAGTG<br>CCTTGTGCAACCTTTTGTGGGTGCCGATC<br>GGTGTCTTAAACACCGACTTTTCTCGTTAT<br>ATCCTCGCCGATATCAACAGCGACCTTATT<br>AGCCTCTATAACATCGTGAAGTTACGTACT<br>GACGAGTA                                                                               | DNA adenine methylase                         |                                       |
| 216. StyR-367 | 115 | ATTGGGGATGTATCTGGATCAACAACGAG<br>GAGCTGCATGATGAATCCACAGGCAACCA<br>CAACTGATGAATTAACCTTTACCAGGCCGC<br>AAGGCGAGCTGAAAAAGCAAGTCCTGA                                                                                                                                | malate synthase A                             | Overlap of putative 5'-<br>UTR- 39 nt |
| 217. StyR-368 | 226 | GATCAGATCGCTTTTGAAAAAGTGGTCACC<br>GCGCCGGTTGAAAAAGCGCAAGAGAAAAC<br>CGAGGTAGCACCGGTAGCGTCTCCGGCAG<br>TCGTTGCGCCAGCCGCAAAAAGCGCGGCC<br>CATGAACATCATGCGGGCGTGAAAAACC<br>TGCGCGTGAACGCGAGTCCACCAGCATTTCG<br>CGTGGCGGTAGAGAAAGTGGATCAGCTCA<br>TAAACCTGGTCGGCGAGTTAG | chemotaxis protein<br>CheA                    |                                       |



**Table S3. Known npcRNAs in *E. coli* and/or other *Salmonella* strains.**

| ERNS         | cDNA (nt) | Coordinates in <i>S. Typhi ty2</i> genome | N. blot | Known npcRNA in other enterobacteria | Coordinates in <i>E.coli</i>                       |
|--------------|-----------|-------------------------------------------|---------|--------------------------------------|----------------------------------------------------|
| 6S RNA       | 194       | 3070109-3070298>                          | NP      | All Enterobacteria                   | <i>E. coli</i> -3054005-3054185 (from our library) |
| 4.5S RNA     | 68        | 2463713-2463780<                          | NP      | All Enterobacteria                   | <i>E. coli</i> -475709-47576 (from our library)    |
| StyR-56      | 69        | 806323-806255<                            | Yes     | RyeE - <i>E. coli</i>                | <i>E. coli</i> -2165148-2165217 (from our library) |
|              |           |                                           |         | OmpX- <i>S. Typhimurium</i>          | <i>E.coli</i> -2165136-2165221(RyeE)               |
| StyR-366     | 105       | 1299620-1299517<                          | NP      | rprA - <i>E. coli</i>                | <i>E.coli</i> -1768396-1768499                     |
|              |           |                                           |         | rprA- <i>S. Typhimurium</i>          | <i>E.coli</i> - (rprA)                             |
| StyR-7       | 238       | 251005-251242                             | NP      | t44 - <i>E. coli</i>                 | <i>E. coli</i> -189711-189944 (from our library)   |
|              |           |                                           |         |                                      | <i>E. coli</i> -189712-189847 (t44)                |
| StyR-23      | 138       | 332924-333061                             | Yes     | SroF - <i>E. coli</i>                | <i>E. coli</i> -2689345-2689217 (from our library) |
|              |           |                                           |         |                                      | <i>E. coli</i> -2689362-2689179 (SroF)             |
| StyR-97      | 83        | 3013177-3013259<                          | NP      | RygB/OmrB - <i>E. coli</i>           | <i>E. coli</i> -2974407-2974328 (from our library) |
|              |           |                                           |         |                                      | <i>E. coli</i> -2974407-2974332 (RygB/OmrB)        |
| StyR-111     | 86        | 128205-128120<                            | Yes     | SroA - <i>E. coli</i>                | <i>E. coli</i> -75523-75605 (from our library)     |
|              |           |                                           |         |                                      | <i>E. coli</i> -75516-75608 (SroA)                 |
| StyR-183     | 82        | 3330462-3330543                           | Yes     | RyhA - <i>E. coli</i>                | <i>E. coli</i> -3348664-3348745 (from our library) |
|              |           |                                           |         |                                      | <i>E. coli</i> -3348599-3348706 (RyhA)             |
| StyR-229     | 198       | 3205319-3205516                           | Yes     | RyhD - <i>E. coli</i>                | <i>E. coli</i> -3192776-3192922 (from our library) |
|              |           |                                           |         |                                      | <i>E. coli</i> -3192743-3192887 (ryhD)             |
| StyR-239     | 150       | 3721814-3721960                           | NP      | SPORT-42/spf- <i>E. coli</i>         | <i>E. coli</i> 4047885-4048030 (from our library)  |
|              |           |                                           |         |                                      | <i>E. coli</i> 4047922-4048030 (SPORT-42/spf)      |
| StyR-290/360 | 64        | 2275510-2275575<br>2275539-2275627        | Yes     | SroC - <i>E. coli</i>                | <i>E. coli</i> 685967-686032 (from our library)    |
|              |           |                                           |         |                                      | 685907-686007 (from our library)                   |
|              |           |                                           |         |                                      | <i>E. coli</i> -685904-686066 (SroC)               |
| StyR-323     | 87        | 2431993-2432070                           | NP      | SroB - <i>E. coli</i>                | <i>E. coli</i> -506440-506509 (from our library)   |
|              |           |                                           |         |                                      | <i>E. coli</i> -506428-506509 (SroB)               |
| StyR-330     | 64        | 1597142-1597225                           | Yes     | RydC - <i>E. coli</i>                | <i>E. coli</i> -1489530-1489467 (from our library) |
|              |           |                                           |         |                                      | <i>E. coli</i> -1489529-1489468 (rydC)             |

A.

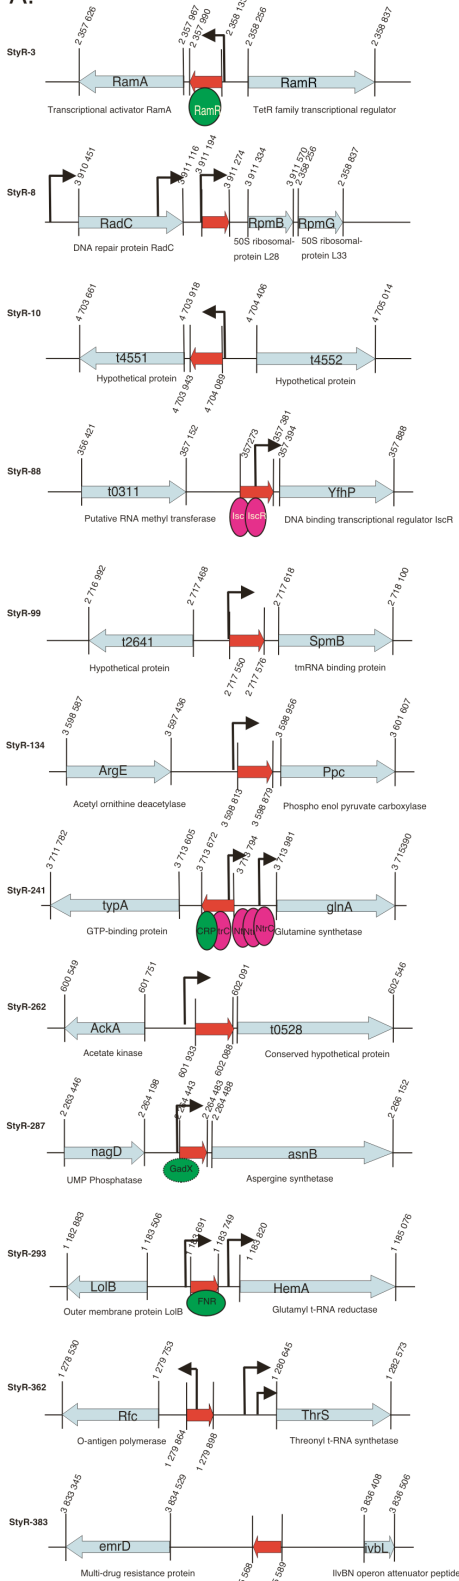

B.

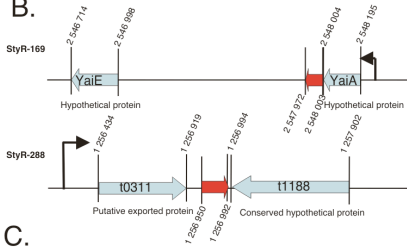

C.

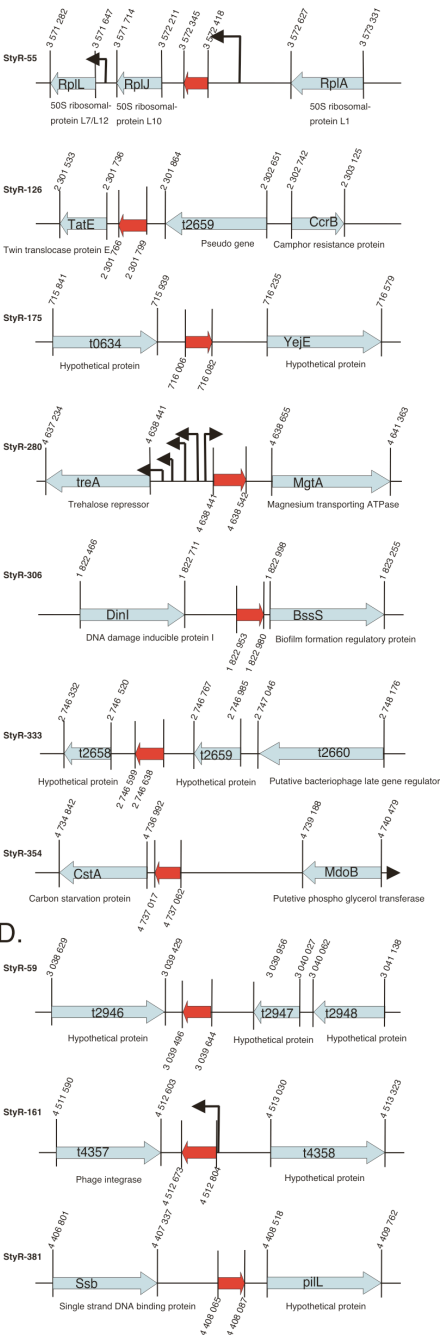

Supplementary Figure S1

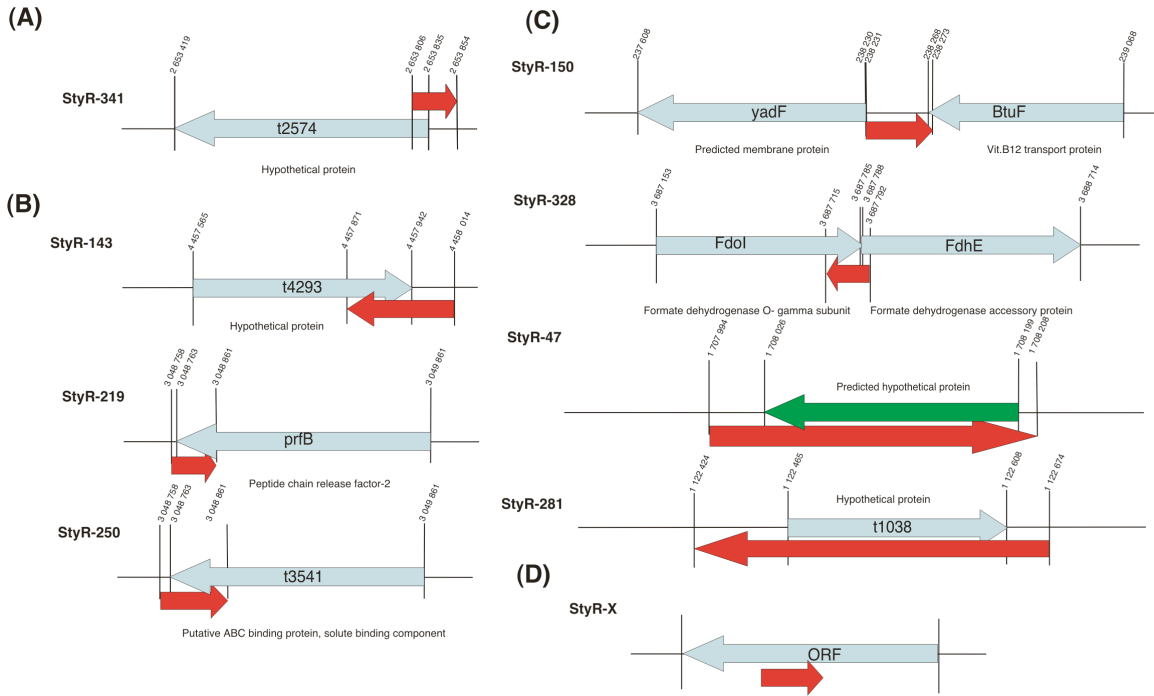

Supplementary Figure S2

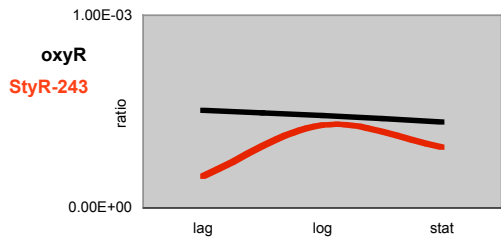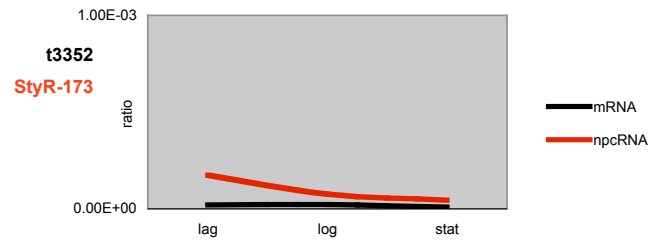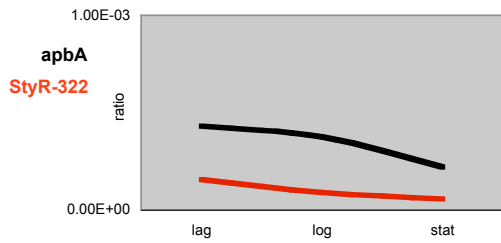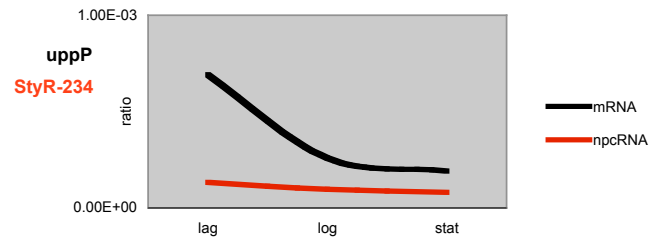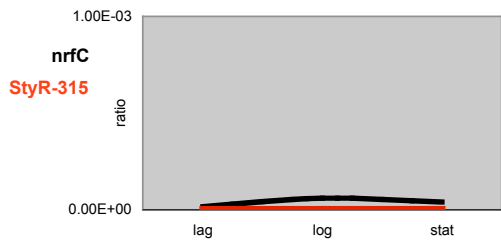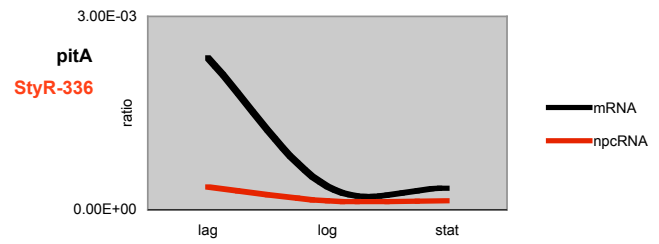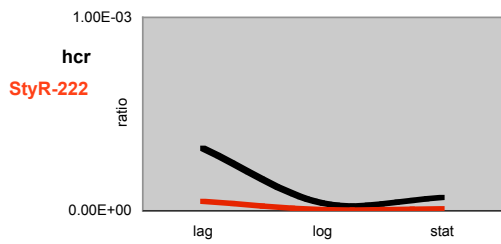

**Supplementary Figure S3**

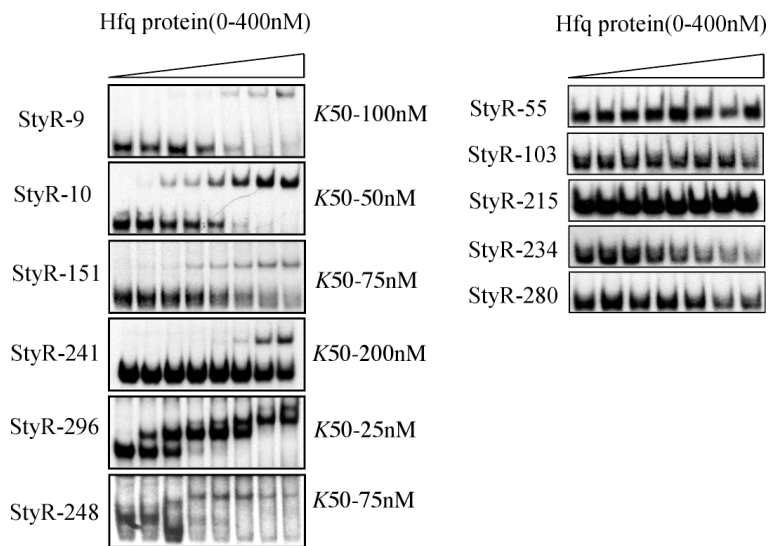

**Supplementary Figure S4**
